1 **Short Title:** SPCH modulates the salt response of palm stomata

2 \* **Corresponding author:** Gen Hua Yue; Email: genhua@tll.org.sg; Tel: +65-68727405

3 **The SPEECHLESS-induced stomatal increase is required for the salt tolerance of oil**  
4 **palm**

5 Zhuojun Song<sup>1</sup>, Le Wang<sup>1</sup>, Chong Cheong Lai<sup>1</sup>, Zituo Yang, May Lee<sup>1</sup> and Gen Hua Yue<sup>1,2</sup>

6 \*

7 <sup>1</sup> Molecular Population Genetics and Breeding Group, Temasek Life Sciences Laboratory, 1

8 Research Link, National University of Singapore, Singapore 117604

9 <sup>2</sup> Department of Biological Sciences, National University of Singapore, 14 Science Drive 4,

10 Singapore 117543

11 **One sentence summary:** Oil palm exhibits diverse biological responses to the different levels  
12 of salt stress and salt activates oil palm SPEECHLESS (EgSPCH) to modulate stomatal density  
13 in response to salt stress.

#### 14 **Author contributions**

15 ZJS and GHY designed the research. ZJS and CCL challenged oil palm samples, ZJS  
16 constructed the biological materials and performed the experiments. ZJS carried out  
17 bioinformatics analysis with contributions from LW and YZT. ZJS and GHY drafted the  
18 manuscript. All authors read and approved the final manuscript.

#### 19 **Funding information**

20 This work was supported by the Internal Funds of the Temasek Life Sciences Laboratory

21

22 **Abstract**

23 Oil palm is the most productive oil producing plant. Salt stress leads to growth damage and  
24 decrease in yield of oil palm. However, the physiological responses of oil palm to salt stress  
25 and their underlying mechanisms are not clear. RNA-Seq for leaf samples from young palms  
26 challenged under three levels of salts (100, 250 and 500 mM NaCl) and control for 14 days  
27 was conducted. Diverse signalling pathways were involved in responses to different levels of  
28 salt stress. All the three levels of salt stress activated *EgSPCH* expression and induced stomatal  
29 density of oil palm, which was contrasting to that in *Arabidopsis*. Under strong salt stress group,  
30 oil palm removed excessive salt via stomata. Overexpression of *EgSPCH* in *Arabidopsis*  
31 increased the stomatal production but lowered the salt tolerance. These data suggest that in oil  
32 palm, salt activates *EgSPCH* to generate more stomata in response to salt stress. Our results  
33 shed a light on the cellular response to salt stress of oil palm and provide new insights into the  
34 mechanisms of different salt-induced stomatal development between halophytes and  
35 glycophytes.

36 **Key words:** palm; salt stress; stomata; signalling, SPEECHLESS;

## 37 INTRODUCTION

38 Oil palm (*Elaeis guineensis*, Jacq.) produces the highest yields of plant oil (Corley and Tinker,  
39 2008). Due to the negative effects of oil palm expansion, such as deforestation and decreasing  
40 biodiversity, sustainable plantation and management is the way to increase oil production and  
41 minimize the damage to environment (Fitzherbert et al., 2008). Oil palm is cultivated in tropical  
42 areas of Asia, Africa and America (Corley and Tinker, 2008) where many coastal soils of those  
43 areas are salinized due to tidal waters (Henry and Wan, 2012). The fresh fruit bunch (FFB)  
44 yields of oil palm dramatically decreased on the saline soils (Henry and Wan, 2012). Therefore,  
45 the genetic improvement by selecting salt-tolerant oil palm varieties is important for  
46 sustainable palm oil production (Corley and Tinker, 2008). However, not much is known about  
47 the molecular mechanism underlying salt tolerance in oil palm.

48 Over the past decade, the molecular mechanisms of salt-tolerance have been largely studied  
49 in *Arabidopsis* and agronomic plant species, such as rice (Kumar et al., 2013; Zhang et al.,  
50 2021). Salt stress can directly change the biological compounds physically or chemically in  
51 plant cells, which cause cellular response (Zhang et al., 2021). Furthermore, salt stress leads to  
52 ionic stress, secondary stresses and osmotic stress and oxidative stress, thereby triggering  
53 multiple complex signalling pathways (Yang and Guo, 2018). The leucine-rich repeat extensins  
54 (LRX)- Raf like kinase (RALF)- FERONIA (FER) module is important for cell wall integrity  
55 and cell wall associated biological processes (Feng et al., 2018). In plants, high salinity disrupts  
56 the cross-link between pectin and LRXs, and the interaction between LRXs and RALFs,  
57 resulting in cell bursting during growth under salt stress (Zhao et al., 2018). Salt stress triggers  
58 cytosolic  $Ca^{2+}$  signal, which activates the  $Na^+$  homeostasis required Salt Overly Sensitive (SOS)  
59 signalling pathway ultimately,  $H^+$ -ATPase is activated and  $Na^+$  is exported via  $Na^+/H^+$   
60 exchanger driven by  $H^+$ -ATPase (Kumar et al., 2013; Zhang et al., 2021). Many other genes  
61 are also important in ionic stress signalling pathway. They repress the salt sensory system, limit

62 the salt absorption and transportation in plants, regulate root and leaf development and adjust  
63 the ionic balance of cells to raise up the salt tolerance (Munns, 2005; Deinlein et al., 2014).  
64 Transcription factors (TFs) play key roles in the salt stress tolerance of plants. They are  
65 differentially expressed during salt stress, which consequently regulate the transcription of  
66 various downstream genes that are involved in salt tolerance (Golldack et al., 2011). The most  
67 well-known salt tolerance associated TFs, including basic leucine zipper (bZIP), basic helix-  
68 loop-helix (bHLH), MYB, WRKY, APETALA2 and NAC (Zhang et al., 2006; Golldack et al.,  
69 2011; Van Zelm et al., 2020). Among the TFs, a bHLH transcription factor SPEECHLESS  
70 (SPCH) serves as a master regulator of cell development in response to environmental changes  
71 (Lau et al., 2014). SPCH binds to ~ 4.5% of genes in *Arabidopsis*, including key genes in  
72 abiotic stress and hormonal stress signalling pathway (Lau et al., 2014). The function of SPCH  
73 in stomatal initiation is conserved in both dicots and monocots (Lampard et al., 2008; Wu et  
74 al., 2019). Under salt stress, the expression of SPCH was repressed by upstream transcriptional  
75 factors and mitogen-activated protein kinase (MAPK) signalling pathway, resulting in the  
76 reduction of stomatal production in order to avoid water loss (Kumari et al., 2014). Although  
77 these studies provide novel knowledges and new insights of the regulatory networks of salt  
78 tolerance, the complexity of salt resistance, the genetical divergence of different species and  
79 the diversity of environments make it difficult to understand the particular mechanisms of other  
80 plants in response to salt stress (Van Zelm et al., 2020).

81 Only very few studies show the physiological and proteomic changes of palms in response  
82 to salt stress. In oil palm seedlings subjected to salt stress, the content of Na<sup>+</sup> and proline  
83 increased, and the cell membrane was injured in samples treated by the highest salinity at 200  
84 mM NaCl. On the contrary, photosynthetic and growth rate were reduced (Cha-Um et al., 2010).  
85 A proteome study of date palm suggests that ATP synthase and RubisCO activase are  
86 significantly changed during salt stress (El Rabey et al., 2016), indicating the importance of

87 biosynthesis for salt tolerance. These studies show the physiological responses of palms under  
88 salt stress. However, the cellular level response and the molecular mechanisms of the salt  
89 tolerance of palms are still unknown.

90 The purpose of this study was to investigate the salt response of oil palm on cellular level  
91 and identify the critical regulators and signalling pathways involved in salt-tolerance. Herein,  
92 we found that oil palm exhibits diverse biological strategy in response to different level of salt  
93 stress. Furthermore, we found salt stress induced converse regulation of *SPEECHLESS*  
94 expression in oil palm and *Arabidopsis*, which leads to the reverse stomatal response.  
95 EgSPEECHLESS putatively regulates the expression of 41% of the DEGs. Our study shed a  
96 light on the molecular mechanism that explain the different physiological and cellular  
97 responses to salt between tree crops and herb crops.

## 98 **RESULTS**

### 99 **Morphological and physiological responses to salt tolerance**

100 Oil palm seedlings with same developmental stage were selected for salt stress assay with daily  
101 watering 150 mL of the following four gradient NaCl concentrations: 0 mM (Mock, water only)  
102 100 mM, 250 mM and 500 mM for 14 days. Rescue-assay with watering was performed for  
103 another 14 days. Common plant stress responses, including leaf tip necrosis, leaf yellowing  
104 and wilting, were observed in all the salt treated samples (Figure 1A). In addition, the roots of  
105 salt treated oil palms shrank or even rotted after 14 days (Figure 1A). With the increasing of  
106 salt concentration, the above responses of leaf and roots were enhanced (Figure 1A, C).  
107 Interestingly, salt emitted and crystalized on leaf epidermal of oil palms treated with high  
108 concentration of salt at 250 mM and 500 mM (Figure 1C, Supplemental Figure S1), suggesting  
109 that under strong salt stress, oil palm discharges the absorbed salt by transpiration stream via  
110 stomata. This physiological reaction was found in halophytes (Robinson et al., 1997) but was  
111 rare in non-halophytes, indicating that oil palm may has high salt tolerance as a non-halophyte.

112 To investigate the effect of salt stress on later growth of plants, rescue assay was performed by  
113 giving all the samples 150 mL water daily for another 14 days. Plants treated with 2-weeks of  
114 salt with 100 mM NaCl and 250 mM NaCl survived after rescue assay. However, 500 mM  
115 NaCl was lethal to long term growth of oil palm (Figure 1B). These results indicate that oil  
116 palms show diverse physiological responses to different level of salt stress.

### 117 **DEGs of oil palm in response to different level of salt stress**

118 Average cleaned reads of 46.2, 35.0, 59.4 and 35.9 million were obtained and from the Mock,  
119 100 mM, 250 mM and 500 mM NaCl groups, respectively (Supplementary Table S7). A total  
120 of 363, 242 and 433 DEGs were identified from salt stress groups (100, 250 and 500 mM NaCl,  
121 Figure 2). In detail, 86 down-regulated and 277 up-regulated DEGs were identified in 100 mM  
122 NaCl group (Figure 2A), 155 down-regulated and 87 up-regulated DEGs were identified in 250  
123 mM NaCl group (Figure 2A), 249 down-regulated and 184 up-regulated DEGs were identified  
124 in 500 mM NaCl group (Figure 2A). PCA and hierarchical clustering analyses were performed.  
125 The control and salt treatment groups were clearly differentiated and showed substantial  
126 differences (Figure 3, Supplemental Figure S2). In addition, three DEGs (*EgSPCH*, *EgPAT1*  
127 and *EgRPS3*) were up-regulated in all the salt treatment groups (Figure 2A). *EgSPCH* is a  
128 homolog of Arabidopsis SPEECHLESS, which is a bHLH transcription regulator that directly  
129 controls stomatal development and regulates the expression of thousands of genes (Lau et al.,  
130 2014). Both *PAT1* and *RPS3* are expressed in chloroplast. *PAT1* decays ABA responsive genes  
131 thereby regulating salt tolerance (Zuo et al., 2021). *EgRPS3* is required for plant pathogen  
132 resistance (Bisgrove et al., 1994). These data suggest that although only a few of DEGs were  
133 overlapped across different level of salt stress, light-induced biological process and stomatal  
134 development are required in general defence of oil palm in response to different level of salt  
135 stress.

136 **Oil palms exhibit diverse biological strategies in response to different levels of salt stress**

137 Analysis of GO enrichment showed that in samples treated by low level of salt (100 mM NaCl),  
138 defense/stress response, metabolic process and plant development were the main signaling  
139 pathways of the DEGs (Table 1, Figure 4A). Most of the salt response related DEGs were up-  
140 regulated while most of the DEGs in terms of response to biotic stimulus (bacterium and fungi)  
141 and other abiotic responses were down-regulated (Table 1, Figure 4A). In addition, genes  
142 regulating other development such as seed, ovule and roots, were down-regulated (Table 1),  
143 implying the metabolic and cell developmental compensation in response to salt stress by  
144 sacrificing other defense systems and development events.

145 In 250 mM NaCl group, biosynthesis and metabolic process contribute equally (48.4% and  
146 44.4%) in response to salt stress (Supplemental Table S2, Figure 4B) where secondary  
147 metabolites synthesis and cell wall biogenesis were dominant in the regulatory signaling  
148 pathways (Supplemental Table S2, Figure 4B). The accumulation of flavonoid and chalcone  
149 during salt stress were largely found in other crops as they are important for plant salt tolerance  
150 by maintaining reactive oxygen species (ROS, (Lijuan et al., 2015; Chen et al., 2019). Positive  
151 regulators of flavonoid (LOC105055971, LOC105054663) and chalcone (LOC105050962)  
152 synthesis were up-regulated (Supplemental Table S2). The cell wall is a crucial component of  
153 the plant cell which is highly dynamic and quickly responsive to abiotic stimulus. The  
154 maintenance of cell wall homeostasis is essential for the stress tolerance of plant cells  
155 (Zagorchev et al., 2014; Zhao et al., 2018). The epidermal cells of fresh young leaves sampled  
156 from mock and salt stress groups showed that under salt stress, the epidermises consisted of  
157 more and longer pavement cells (Figure 4D). The cell wall integrity of 100 mM NaCl group  
158 was comparable with the Mock group (Figure 4D), while in the 250 mM NaCl and 500 mM  
159 NaCl group, the epidermal cells, especially the guard cells and their surrounding pavement  
160 cells were largely damaged and propidium iodide (PI) permeated into the cytosol of these

161 necrotic cells (Figure 4D). Unlike the epidermal cells in Mock and 100 mM NaCl group, which  
162 were linearly distributed, the epidermal cells in 250 mM and 500 mM were tortile (Figure 4D).  
163 These data suggest that high salinity soil is harmful to the cell integrity. Thus, in response to  
164 the high salinity, the oil palm increased the cell wall biogenesis in order to maintain  
165 homeostasis. (Supplemental Table S2, Figure 4B).

166 In samples that have undergone high salt stress (500 mM NaCl), DNA & RNA processing  
167 and amino acids & sugar metabolisms are key pathways in response to salt stress. The  
168 expression of some genes associated with starch and glycogen synthesis (LOC105047182,  
169 LOC105058934 etc.) are inhibited (Supplemental Figure S3, Figure 4C), which might lead to  
170 the reduction of starch accumulation during salt stress. This result is in agreement with the  
171 previous study in rice (Chen et al., 2007). Most of DNA damage repair genes were up-regulated,  
172 suggesting that high salinity may cause severe DNA damage and thus activating the DNA  
173 repair system of oil palms (Supplemental Table S3, Figure 4C).

174 Interestingly, genes that regulate stomatal development and stomatal movement were up-  
175 regulated in all the salt treatment groups (Table 1, Supplemental Figure S2-3), implying the  
176 importance of stomata in salt tolerance. Taken together, our data suggest oil palm activates its  
177 salt tolerance signaling pathways in response to low salt stress. Secondary metabolism  
178 synthesis and cell wall biogenesis were enhanced to improve the cell integrity of samples  
179 treated by 250 mM NaCl. There was possible DNA damage in high salinity samples (500 mM  
180 NaCl) and DNA damage repair pathway was significantly activated. Importantly, stomatal  
181 development and stomatal movement were required for salt tolerance of oil palm in response  
182 to both low and high salt stress.

183 **The balance of stomatal development and movement are required for salt tolerance**



184 Stomata is an ion-sensitive valve that control gas exchange and water emission thereby playing  
185 essential roles in abiotic stress tolerance (Vahisalu et al., 2008). Chloride channel (CLC) family  
186 functions in salt tolerance by regulating stomatal movement via controlling nitrate homeostasis  
187 and pH adjustment in *Arabidopsis* (Jossier et al., 2010). In rice, DST (DROUGHT AND SALT  
188 TOLERANCE) regulates salt tolerance by controlling stomatal movement via modulating  
189 H<sub>2</sub>O<sub>2</sub> homeostasis (Huang et al., 2009). In our study, DEGs in terms of stomatal development  
190 and movement were identified in all the salt stress groups (Table 1, Supplemental Table S2-3),  
191 suggesting the importance of stomata in salt resistance. To understand how the stomata  
192 contributes to the salt tolerance of oil palm, the stomatal density and stomatal aperture of  
193 samples from Mock and salt stress groups were monitored (Figure 5). In salt-treated groups,  
194 the stomatal apertures were significantly smaller than that in mock group ( $p < 0.01$ ).  
195 Furthermore, in higher salinity groups (250 mM and 500 mM NaCl), the stomatal aperture is  
196 smaller than that in low salinity group (100 mM NaCl). In salt treatment groups, the stomatal  
197 density was higher than that in control group, but there was no difference between these salt  
198 stress groups (Figure 5). These data suggest that salt-induced osmotic stress strongly represses  
199 the stomatal opening but activates stomatal development (Figure 5). Our data supports the  
200 previous studies in rice and *Arabidopsis* that plants reduce the stomatal apertures to limit water  
201 loss and reduce transpiration under salt stress (Huang et al., 2009; Jossier et al., 2010). However,  
202 our findings that salt stress induces higher stomatal density differs with previous studies in  
203 other herbaceous crops, which found that lower stomatal density facilitates the salinity adaption  
204 (Huang et al., 2009; Orsini et al., 2012). Interestingly, salt also induces the reduced stomatal  
205 aperture and the increase of stomatal density in a ligneous plant *Populus alba L*, where the salt  
206 tolerant line 14P11 shows higher stomatal density and smaller stomatal size (Abbruzzese et al.,  
207 2009). According to our data, oil palm exhibited halophyte-like salt emission and could survive  
208 under 100 mM NaCl for long periods (Figure 1). Higher stomatal density may facilitate the

209 emission of salt along with transpiration, whilst at the same time, the smaller stomatal aperture  
210 is beneficial in restricting water loss. Our data suggest that the balance between stomatal  
211 density and stomatal movement is required for salt tolerance of oil palm.

212 **The overexpression of oil palm SPEECHLESS facilitates stomatal development and**  
213 **decrease salt tolerance in *Arabidopsis***

214 SPEECHLESS is a key bHLH transcription factor that binds and regulate thousands of genes,  
215 and is also a master regulator in stomata initiation (Lau et al., 2014). However, the association  
216 between SPEECHLESS and salt tolerance is unclear. In our study, the expression of oil palm  
217 *SPEECHLESS* (*EgSPCH/LOC105040725*), which is a homolog gene of *AtSPEECHLESS*, was  
218 up-regulated in all the salt treatment groups (Table 1-3, Supplemental Figure S3). In order to  
219 determine the function of *EgSPCH* in stomatal development and salt tolerance, the CDS of  
220 *EgSPCH* was cloned into pBGW541 vector driven by the 35S promoter. The plasmid was then  
221 transformed into *Arabidopsis* and the transformation was validated by microscopy and PCR  
222 (Figure 6C). Like *AtSPEECHLESS* (*AtSPCH*), *EgSPCH* was also localized in the nucleus of  
223 epidermal cells (Figure 6A). The introduction of *35S:EgSPCH* significantly increased the  
224 stomatal production in *Arabidopsis* (Figure 7C), while both Col-0 and *35S:EgSPCH* exhibited  
225 decreased stomata in 150 mM NaCl treatment (Figure 7C, D). The result of a salinity assay  
226 showed that the *35S:EgSPCH*-YFP plants had a lower salt tolerance (Figure 7A, B). These  
227 results indicate the similarity of *EgSPCH* and *AtSPCH* in facilitating stomatal development.  
228 Our results in *35S:EgSPCH*-YFP plants is in agreement with a previous study where the high  
229 salinity stress inhibits the growth and stomatal development of *Arabidopsis* (Kumari et al.,  
230 2014). However, in oil palm, *SPCH* showed an opposite transcriptional response, where it was  
231 activated by salt. This was likely induced by unknown upstream signaling pathway that  
232 activates *SPCH* expression in oil palm.

233 **SPCH is a key molecular switch of transcriptomic response to salt stress**

234 In *Arabidopsis*, SPCH directly controls the transcription of thousands of genes, including key  
235 regulators in abiotic stress responsiveness, hormonal signaling and developmental processes  
236 (Lau et al., 2014). To identify the effect of alternative EgSPCH expression during salt stress,  
237 our DEGs were compared with the chromatin immunoprecipitation (ChIP) sequencing dataset  
238 of AtSPCH targets in *Arabidopsis* (Lau et al., 2014). In total, 40.9% of DEGs (with 60.1% and  
239 38.6% of up- and down- regulated genes, respectively) were putative targets of EgSPCH  
240 (Figure 8A, Supplemental Table S6). Gene Ontology (GO) terms for genes involved in salt-  
241 tolerance, including hormonal and abiotic stress stimulus, developmental processes, organic  
242 compound biogenesis and metabolic processes were significantly enriched (Figure 8C). In  
243 addition, SPCH plays a key role in transcriptional regulatory cascade of the salt tolerance of  
244 plants via controlling the expression of other transcription factors (Lau et al., 2014). In this  
245 study, EgSPCH putatively binds to bHLH, MYB, C2H2, NAC, bZIP and many other  
246 transcription factors (Figure 8B, Supplemental Table S4). The high percentage of EgSPCH  
247 targets among DEGs suggests that EgSPCH is a key transcriptional switch for the salt tolerance  
248 of oil palm, EgSPCH and its targets were highly responsive to salt stress, thereby regulating  
249 multiple downstream signaling pathways.

250

## 251 **DISCUSSION**

### 252 **Similar salt stress response of stomata between oil palm and halophytes**

253 Stomata are minute openings found in the epidermis of the plants, which control CO<sub>2</sub> intake  
254 for photosynthesis and regulates water loss. Stomata consist of pairs of guard cells, which are  
255 required for stomatal movement (Hetherington and Woodward, 2003). The ATP driven proton  
256 pumps in guard cells are key elements for stomatal movement, which are highly sensitive to  
257 various environmental changes (Hetherington and Woodward, 2003). The dynamic changes of  
258 stomatal development and movement in halophytes under salt stress have received attention.  
259 In non-halophytes, salt stress causes increase in ABA biosynthesis, H<sub>2</sub>O<sub>2</sub> accumulation and K<sup>+</sup>  
260 availability reduction, which represses stomatal development and induces stomatal closure  
261 (Hedrich and Shabala, 2018). However, the stomata of naturally salt tolerant halophytes  
262 function well in high salinity that would kill most other plants (Hedrich and Shabala, 2018).  
263 ABA content remain constant in the leaves of halophyte, on the other hand, polyphenols,  
264 specifically flavanols, accumulate much faster and maintained a higher content level in guard  
265 cells of halophytes than in the glycophytes, which are required for guard cell sensitivity to ROS  
266 (Watkins et al., 2017). Interestingly, in halophytes, stomata are also pipe for salt discharge  
267 (Chen et al., 2019). In our study, although the stomatal aperture was still affected by salt stress  
268 (Figure 7C), the stomatal production was not repressed, allowing the salt discharge via stomata  
269 (Figure 1C). The salt stress assay showed that oil palms were able to grow well in 100 mM  
270 NaCl with no obvious morphological changes and could survive in long periods of 250 mM  
271 NaCl treatment, suggesting a relatively higher salt tolerance than glycophytes where 250 mM  
272 is lethal (Stepien and Johnson, 2009). Collectively, oil palm exhibited intermediate salt  
273 tolerance and physiological response to salt between halophytes and glycophytes, thereby  
274 providing the possibility of oil palm transplantation in coastal saline soils via genetic selection.

## 275 **DEGs of three levels of salt stress were involved in different signaling pathways**

276 In a previous study, the growth of oil palms was inhibited when exposed to 200 mM NaCl  
277 (Cha-Um et al., 2010). However, the repression of growth was not obvious when expose to low  
278 levels (50 and 100 mM NaCl) of salinity (Cha-Um et al., 2010). To investigate the cellular  
279 responses to a larger salinity gradient and the molecular mechanisms behind them, oil palm  
280 seedlings were exposed to three levels of salinities, 100, 250 and 500 mM of NaCl. In general,  
281 genes among auxin/ABA induced signaling pathways involved in stress response, plant  
282 development and flavonoid biosynthesis were regulated (Supplemental Table S4). At cellular  
283 level, pathways involved in stomatal complex development and stomatal movement were  
284 significantly regulated (Supplemental Table S4). Although the significant transcriptomic  
285 changes were found in all the salt stress groups (Figure 3, Supplemental Figure S2), the DEGs  
286 were different and were involved in different signaling pathways (Figure 1, Figure 4, Table 1,  
287 Supplemental Figure 2-3). In 100 mM NaCl group, although oil palm seedlings did not exhibit  
288 obvious growth repression within 14 days (Figure 1), the transcriptome was largely changed.  
289 In 250 mM and 500 mM groups, cell membrane and cell wall were damaged (Figure 4,  
290 Supplemental Table S2-3), which was similar to the previous study in oil palm exposed to 200  
291 mM NaCl (Cha-Um et al., 2010). Therefore, the cell wall biosynthesis signalling pathway was  
292 activated in higher salinity levels (Supplemental Table S2, S4). However, the exposure to low  
293 salinity for a short period is sufficient to activate the cell wall biosynthesis in *Arabidopsis* (Shen  
294 et al., 2014), supporting our conclusion that oil palm showed a relatively higher salt tolerance.  
295 DNA damage and protein degradation were pronounced under strong salt stress (Ma et al.,  
296 2006; Zvanarou et al., 2020). In 500 mM group, many genes involved in DNA repair and  
297 protein metabolic signalling pathway were regulated (Supplemental Table S3-4). The  
298 transcriptional analysis of oil palm rosette leaves under different salinity levels suggests that  
299 oil palm use diverse biological strategies in response to salt stress. Among those strategies,

300 stomatal development and movement contribute to the cellular response to multiple levels of  
301 salinity.

### 302 **The salt response of stomatal density in oil palm**

303 Stomata is hypersensitive to abiotic and hormonal stimulus (Hedrich and Shabala, 2018; Ku et  
304 al., 2018). In *Arabidopsis* and other crops, salt stress induces the reduction of stomatal aperture  
305 and stomatal density (Huang et al., 2009; Jossier et al., 2010), preventing plants from water  
306 loss during osmotic stresses. Interestingly, we found that salt stress increased stomatal density  
307 in oil palm (Figure 5). This physiological trait was only found in other ligneous plant such as  
308 *Populus alba L* (Abbruzzese et al., 2009). It would be interesting to test the response of stomatal  
309 density in other fruit trees. Furthermore, the stomatal density had no difference between each  
310 salt stress group, suggesting that low salinity is enough to activate stomatal development with  
311 maximum effect. Our data also provided a possible strategy to increase the salt tolerance of oil  
312 palm that by salt acclimation with a low salinity before transplanting to higher salinity. Taken  
313 together with our data that oil palm could remove excess salt via the stomata (Figure 1), we  
314 hypothesized that oil palm balances the stomatal movement and development in response to  
315 salt stress. Salt induced stomatal development, allowing salt discharge by transpiration stream  
316 via stomata. At the same time, stomatal aperture was reduced to keep the water in the plant.  
317 Our research identified the unique salt response of stomatal density in oil palm and introduce  
318 an interesting scientific question whether the different responses exist commonly between  
319 ligneous and herbaceous plants.

### 320 **Elevated EgSPCH expression in oil palm and *Arabidopsis* led to same output of stomatal** 321 **development but opposite effect on salt tolerance**

322 SPEECHLESS is a master transcription factor which regulates the expression of thousands of  
323 genes (Lau et al., 2014). In addition, it is also a key stomatal initiator (Lampard et al., 2008).

324 In our study, EgSPCH was up-regulated in all the three levels of salt stress, therefore its  
325 expression and function in *Arabidopsis* was tested. EgSPCH showed similar function with  
326 AtSPCH on stomatal development, suggesting that elevated expression of EgSPCH in both oil  
327 palm and *Arabidopsis* led to increased stomatal density (Figure 7). However, the increase of  
328 stomatal production induced by EgSPCH resulted in weaker salt tolerance (Figure 7). In our  
329 salt assay, EgSPCH putatively bound to 41% of DEGs, most of them were critical transcription  
330 factors and key regulators in stress tolerance and cell development (Figure 8).. The function of  
331 SPEECHLESS in stomatal initiation was verified in other monocot plants (Wu et al., 2019)  
332 and the repression of OsSPEECHLESS by salt was found in rice (Kumar et al., 2013),  
333 suggesting that the activation of EgSPCH by salt in oil palm is not monocot specific. Our data  
334 that salt induce stomatal production in oil palm is in agreement with a previous study in another  
335 ligneous plant *Populus alba L* (Abbruzzese et al., 2009). The phenotype that oil palm remove  
336 excess salt via stomata is in accordance with that in halophytes (Chen et al., 2019). Therefore,  
337 it was hypothesized that ligneous plants or halophytes whose average salt tolerance are better  
338 than herbaceous plants, may have evolved a different regulatory network of SPEECHLESS to  
339 produce more stomata in response to salt tolerance. It would be valuable to test the stomatal  
340 behavior and the SPEECHLESS expression in more ligneous plants and halophytes. The key  
341 to solve the functional evolutionary mechanisms between ligneous and herbaceous plants on  
342 cell development and abiotic stress tolerance is identification of the upstream regulators of  
343 EgSPCH during salt stress.

#### 344 **The mechanism of salt tolerance in oil palm**

345 Plants respond to environmental factors rapidly at cellular level. Here, we identified a  
346 molecular link that connect salt induced signaling pathways to stomatal development. Based  
347 on our data, we proposed a working model where salt stress activates stomatal development  
348 through activation of the stomatal initiator SPEECHLESS (Figure 9). Transcriptional

349 activation of *EgSPCH* would lead to higher stomatal density, allowing the salt emission via  
350 stomata (Figure 9). In addition, the activation of *EgSPCH* would regulate multiple biological  
351 processes via transcriptional control of mass DEGs (Figure 9).

352 Another potential regulation of *SPCH* expression in oil palm is at the post-translational level  
353 via MAPK signaling pathway (Lampard et al., 2008). However, we failed to detect  
354 phosphorylated MAPKs using p44/42 MAPK antibody which works well in our previous  
355 studies in *Arabidopsis*. Usually *SPCH* will be regulated with the same direction at both  
356 transcriptional and translational level in response to abiotic factors (Lau et al., 2018; Samakovli  
357 et al., 2020). The reverse regulation of *SPCH* at these two levels has not been reported, thus, it  
358 appears less likely that *SPCH* would be repressed in response to salt stress at protein level.

359 The discovery of salt-induced activation of *EgSPCH* is novel, as previous studies in rice and  
360 *Arabidopsis* either identified the *SPCH* regulation by MAPKs at the protein level or found the  
361 transcription of *SPCH* is repressed by salt, resulting in less stomata (Kumar et al., 2013; Kumari  
362 et al., 2014). Our data explained the phenotype that more stomata is helpful for oil palm to  
363 remove excess salt and maintain photosynthesis under salt stress. Nevertheless, the upstream  
364 regulatory network of *EgSPCH* was unknown. Due to the high environmental plasticity of  
365 stomata, stomatal assay and transcriptomic analysis in halophytes may be able to answer the  
366 question that whether the strong salt tolerance of them are depend on salt-activated  
367 *SPEECHLESS* expression. The comparative genomic analysis and salt stress assay using  
368 ligneous and herbaceous crops would be helpful to examine whether the converse salt response  
369 of stomata between oil palm and *Arabidopsis* mirrors the different salt tolerance of other crops.

370



## 371 MATERIALS AND METHODS

### 372 Plant materials and salt treatment

373 Sixteen two-year-old oil palm seedlings with similar sizes were planted in 20 cm diameter pots  
374 and were placed in a greenhouse with tropical temperature, 30–50% relative humidity and  
375 natural photoperiod. The seedlings were divided into four groups (4 seedlings for each group):  
376 Mock group (control group) was watered daily with 150 mL sterilized water while the salt  
377 stress groups (100 mM, 250 mM and 500 mM NaCl group) were watered daily with equal  
378 volume of 100 mM, 250 mM and 500 mM NaCl diluted by sterilized water, respectively. This  
379 is to simulate the condition of the increasing soil salinity caused by mineral weathering or  
380 ocean withdrawal. After 14 days of salt stress challenge, the young rosette leaves with similar  
381 size in each group were collected.

382 Col-0 and transgenic *35S:EgSPCH-YFP Arabidopsis* seeds were sterilized and grown on ½ MS  
383 plates (0.5 g/L MES, 2.2 g/L Murashige and Skoog salts, 1% [w/v] sucrose, and 0.8% [w/v]  
384 agar, pH 5.6) and kept at 4°C in darkness for 3 days. Plants were grown in a well-controlled  
385 growth chamber at 22°C with 60% relative humidity under long-day conditions (16 h light/ 8  
386 h dark) at a light intensity of 70  $\mu\text{mol m}^{-2} \text{s}^{-1}$ . At 7 dpg, 40 well-grown seedlings were  
387 transferred to either new ½ MS plates (Control) or ½ MS+ 100 mM NaCl plates.

### 388 Plasmid construction and plant transformation

389 To generate *35S:EgSPCH-YFP*, the full length CDS sequence of *EgSPCH* was amplified and  
390 cloned into pENTR/D-TOPO (Thermo Fisher, USA), after which the entry clone was  
391 recombined into the destination vector pGWB541 (Nakagawa et al., 2007) via LR  
392 recombination using Gateway LR Clonase II (Thermo Fisher, USA). The primers  
393 (*EgSPCH*cds-F/R) used for plasmid construction are listed in Supplemental Table S1.

394 Transgenic plants were generated in the Col-0 background through *Agrobacterium*  
395 *tumefaciens*-mediated transformation and selected by hygromycin on ½ MS plates.

### 396 **RNA extraction and sequencing**

397 Total RNA from oil palm leaves of three biological replicates of control (Mock group) and salt  
398 treated samples (100 mM, 250 mM and 500 mM NaCl) was extracted using RNeasy Plant Mini  
399 Kit (Qiagen, Germany). RNA quality and quantity assessment, RNA-seq library preparation,  
400 library quality control and library quantification were performed using previously described  
401 method (Wang et al., 2020). The libraries were sequenced with an Illumina NextSeq500  
402 (Illumina, USA).

### 403 **Measurement of stomatal production and stomatal aperture**

404 Small slices from each young rosette leaves collected after 14-day mock or salt treatment were  
405 stained in propidium iodide (PI, Molecular Probes, P3566; 0.1 mg/ml) immediately for cell  
406 integrity fluorescent microscopy, and images were captured at 20X on a ZEISS Axioscan 7.  
407 For quantification of stomatal density and aperture, fresh leaf slices were first cleared in fixing  
408 buffer (7:1 ethanol: acetic acid) for 8 hours and were mounted in clearing buffer (8:2:1 chloral  
409 hydrate: water: glycerol). Differential contrast interference (DIC) images of the abaxial  
410 epidermis of young leaf slices were captured at 20X on a Leica DM2500 microscope. More  
411 than 20 slices were examined per test. Stomatal density and stomatal aperture were measured  
412 by ImageJ with its built-in tools.

### 413 **Differential expressed genes (DEGs) analysis**

414 Adaptor filtering and cleaning of raw sequencing reads were carried out using SeqKit (Shen et  
415 al., 2016). Cleaned reads were aligned and mapped to the oil palm reference genome (Singh et  
416 al., 2013; Jin et al., 2016) with improved annotation using STAR (Dobin et al., 2013). The  
417 expression level of each gene was counted using HTSeq-count (Anders et al., 2015) and the

418 relative expression of each gene was normalized using DESeq2 (Love et al., 2014) . Transcripts  
419 with more than two times of fold change (FC) value and a significance value less than 0.05  
420 were considered as differentially expressed genes, between mock and salt treatment groups.

#### 421 **Functional annotation of DEGs**

422 The Gene Ontology (GO) accessions of DEGs were retrieved from the PalmXplore database  
423 of oil palm (Sanusi et al., 2018). Principal component analysis (PCA), heatmap analysis, gene  
424 ontology enrichment analysis and signaling pathway clustering of candidate genes based on  
425 the relative expression of DEGs were performed with the program iDEP (Ge et al., 2018) by  
426 referencing to *Arabidopsis*.

#### 427 **Validation of RNA-Seq data using qPCR**

428 The relative expression of EgSPCH and 11 randomly selected DEGs were tested by qPCR, to  
429 examine the validity of the RNA-Seq dataset. The primers used for qPCR are listed in  
430 Supplemental Table S1.  $\beta$ -tubulin gene was used as housekeeping gene (internal control) to  
431 normalize the relative expression of genes. RT-qPCR was performed in CFX96 Touch Deep  
432 Well Real Time PCR System (Bio-Rad, USA) with the program in previous study (Liu et al.,  
433 2020). Each gene for qPCR was performed by a biological/experimental triplicate.

434

#### 435 **Data availability**

436 Raw RNA-seq reads used in this study have been deposited to the DDBJ DRA database with a  
437 DRA submission no. DRA013127

#### 438 **Supplemental Data**

439 **Supplemental Table S1.** Primers used for plasmid construction and Q-PCR in this study

440 **Supplemental Table S2.** Selected DEGs and their KEGG pathways in response to 250 mM  
441 NaCl challenge in the young rosette leaves of oil palm seedlings

442 **Supplemental Table S3.** Selected DEGs and their KEGG pathways in response to 500 mM  
443 NaCl challenge in the young rosette leaves of oil palm seedlings

444 **Supplemental Table S4.** All the DEGs and their annotations in each group

445 **Supplemental Table S5.** Transcription factors among DEGs

446 **Supplemental Table S6.** Putative EgSPEECHLESS targets among DEGs

447 **Supplemental Table S7.** Qualities of clean reads from RNA-Seq

448 **Supplemental Figure S1.** Verification of NaCl crystals on oil palm leaf surface.

449 **Supplemental Figure S2.** The diversities of differentially expressed genes (DEGs) in response to  
450 250 mM and 500 mM NaCl Supplemental Figure S2.

451 **Supplemental Figure S3.** Validation of RNA-Seq by Q-PCR.

452

### 453 **Acknowledgements**

454 This work was supported by the Internal Funds of the Temasek Life Sciences Laboratory

455

### 456 **Table and Figure legends**

457 **Table 1.** Selected DEGs and their KEGG pathways in response to 100 mM NaCl challenge in  
458 the young rosette leaves of oil palm seedlings

459 **Figure 1.** Phenotypical changes of oil palm seedlings in response to different level of salt stress.

460 A, ~2-year-old oil palm seedlings were treated daily with either 150 mL water (Mock) or 150 mL NaCl

461 with four gradient concentration: 100 mM, 250 mM and 500 mM for 14 days. Four seedlings were used  
462 in each group as biological repeats. B, all the seedlings from (A) were recovered with 150 mL water  
463 daily for another 14 days. C, The leaves of oil palms from (A). Red arrows indicate the salt crystals  
464 emitted from leaf surface.

465 **Figure 2. Comparison of differentially expressed genes (DEGs) in the young leaves of oil palm**  
466 **seedlings under three level of salt stress: 100 mM NaCl, 250 mM NaCl and 500 mM NaCl.** A, Up-  
467 and down-regulated DEGs showed by Venn diagrams. B, *P*-value and log<sub>2</sub>foldchange (Log<sub>2</sub>FC) of  
468 DEGs under 100 mM, 250 mM and 500 mM NaCl showed by volcano plots.

469 **Figure 3. The diversities of differentially expressed genes (DEGs) in response to 100 mM NaCl.**  
470 A, Principal component analysis among samples of the 100 mM NaCl and Mock groups based on  
471 randomly selected DEGs. B, Hierarchical clustering among samples of the 100 mM NaCl and Mock  
472 groups based on randomly selected DEGs. 100 mM1, X100 mM2 and X100 mM3 are three biological  
473 repeats of 100 mM NaCl salt stress group, while Mock1, Mock2 and Mock3 are three biological repeats  
474 of Mock group. Up-regulated DEGs and Down-regulated DEGs are represented by red and green bars,  
475 respectively.

476 **Figure 4. Oil palm exhibits diverse biological responses to different level of salt stress.** A-  
477 C, Enrichment of gene ontology (GO) of DEGs against salt challenge at the significance level  
478 of 0.05 in the young leaves of oil palm seedings under 100 mM NaCl (A), 250 mM NaCl (B)  
479 and 500 mM NaCl (C). Up-regulated DEGs and Down-regulated DEGs are represented by red  
480 and blue bars. D, Epidermal cells of young leaves sampled from Mock(d), 100 mM NaCl(e),  
481 250 mM NaCl(f) and 500 mM NaCl(g) staining by PI were showed, scale bar = 25  $\mu$ m.

482 **Figure 5. Salt stress represses stomatal opening and activates stomatal production in oil**  
483 **palm.** A, Stomata of oil palm in Mock, 100 mM NaCl, 250 mM NaCl and 500 mM NaCl groups,  
484 stomata are green coloured, scale bar = 30  $\mu$ m. B, Stomatal aperture of samples from (A). C, Stomatal  
485 density of samples from (A). Values are mean  $\pm$  SD; n = 20. One-way ANOVA with post hoc Tukey  
486 HSD; *p* < 0.01. Samples were treated daily with 150 mL of either water (Mock) or NaCl for 14 days.

487 **Figure 6. Subcellular localization of EgSPCH and the phenotype of transgenic**  
488 **35S:EgSPCH-YFP in *Arabidopsis*.** A, Subcellular localization of 35S-EgSPCH-YFP in 3dpg  
489 abaxial cotyledons. PI staining was used for cell outline. B, Stomata of Col-0 and 35S-EgSPCH-YFP in  
490 3dpg abaxial cotyledons, scale bar = 20  $\mu$ m. C, Validation of transgenic 35S-EgSPCH-YFP using PCR  
491 genotyping, a product including 3'EgSPCH and 5'YFP with 1022 bp was amplified.

492 **Figure 7. Overexpression of EgSPCH increase stomatal production and decrease salt**  
493 **tolerance in *Arabidopsis*.** A, Col-0 and 35S-EgSPCH-YFP seeds were germinated and grown on 1/2  
494 MS plates for 7days, after which, they were transferred to 1/2 MS+ 150 mM NaCl plates for 14 more  
495 days (21 dp). B, Survival rate of Col-0 and 35S-EgSPCH-YFP seedlings at 14 dp and 21 dp. n = 40.  
496 C, Stomatal density of samples from (A) at 14 dp. D, Stomatal index of samples from (A) at 14 dp.  
497 Values are mean  $\pm$  SD; n = 20. One-way ANOVA with post hoc Tukey HSD; p < 0.01

498 **Figure 8. The EgSPCH targets among DEGs are involved in multiple salt tolerance biological**  
499 **processes.** A, Percentage of putative EgSPCH targets DEGs in RNA-seq analysis. B, Enriched GO  
500 terms of EgSPCH targets

501 **Figure 9. A model of the regulatory networks of oil palm leaves in response to different level of**  
502 **salt stress.** In oil palm, salt activates the transcription of EgSPCH in young leaves, which directly  
503 increase the stomatal production on leaf epidermis. Furthermore, EgSPCH binds to ~ 41% of DEGs,  
504 including key transcription factors that regulate diverse biological processes under different level of salt  
505 stress.

506

507

508  
509  
510

**Table 1.** Selected DEGs and their KEGG pathways in response to 100 mM NaCl challenge in the young rosette leaves of oil palm seedlings

| Gene                                          | Annotation                                                               | Subsignaling pathways              | Expression |
|-----------------------------------------------|--------------------------------------------------------------------------|------------------------------------|------------|
| Defense response and stress response (35.9%)  |                                                                          |                                    |            |
| LOC105040031                                  | acts upstream of or within defense response to bacterium                 | response to stress                 | Down       |
| LOC105036933                                  | involved in cellular response to salt stress                             | response to abiotic stimulus       | Up         |
| LOC105059761                                  | acts upstream of or within response to salt stress                       | response to stress                 | Up         |
| LOC105048273                                  | acts upstream of or within response to salt stress                       | response to abiotic stimulus       | Up         |
| LOC105058610                                  |                                                                          | response to stress                 | Down       |
| LOC105054129                                  | acts upstream of or within cellular response to phosphate starvation     |                                    |            |
| LOC105054129                                  | acts upstream of or within response to gibberellin                       | response to endogenous stimulus    | Up         |
| LOC105050654                                  | involved in regulation of response to reactive oxygen species            | response to stress                 | Down       |
| LOC105040397                                  | acts upstream of or within response to abiotic stimulus                  | response to abiotic stimulus       | Down       |
| catabolic and other metabolic process (34.3%) |                                                                          |                                    |            |
| LOC105060222                                  | acts upstream of or within proteasomal protein catabolic process         | catabolic process                  | Down       |
| LOC105060233                                  | acts upstream of or within ubiquitin-dependent protein catabolic process | other metabolic processes          | Down       |
| LOC105039973                                  | enables RNA helicase activity                                            | catalytic activity                 | Down       |
| LOC105054501                                  | enables ammonia-lyase activity                                           | catalytic activity                 | Up         |
| LOC105041996                                  | enables serine-type endopeptidase activity                               | catalytic activity                 | Down       |
| LOC105058751                                  | enables ubiquitin-protein transferase activity                           | catalytic activity                 | Down       |
| LOC105041996                                  | enables serine-type endopeptidase activity                               | catalytic activity                 | Up         |
| LOC105034218                                  | enables lysine-tRNA ligase activity                                      | catalytic activity                 | Down       |
| cell and tissue development (29.8%)           |                                                                          |                                    |            |
| LOC105040725                                  | involved in regulation of stomatal complex development                   | anatomical structure development   | Up         |
| LOC105043171                                  | acts upstream of or within regulation of stomatal opening                | other cellular processes           | Up         |
| LOC105038743                                  | acts upstream of or within embryo development ending in seed dormancy    | post-embryonic development         | Down       |
| LOC105040468                                  | involved in regulation of photoperiodism, flowering                      | multicellular organism development | Down       |
| LOC105052855                                  | acts upstream of or within plant ovule development                       | anatomical structure development   | Down       |
| LOC105032026                                  | acts upstream of or within lateral root development                      | anatomical structure development   | Down       |
| LOC105055813                                  | acts upstream of or within root hair elongation                          | multicellular organism development | Down       |
| LOC105058130                                  | acts upstream of or within xylem and phloem pattern formation            | multicellular organism development | Down       |

511

512

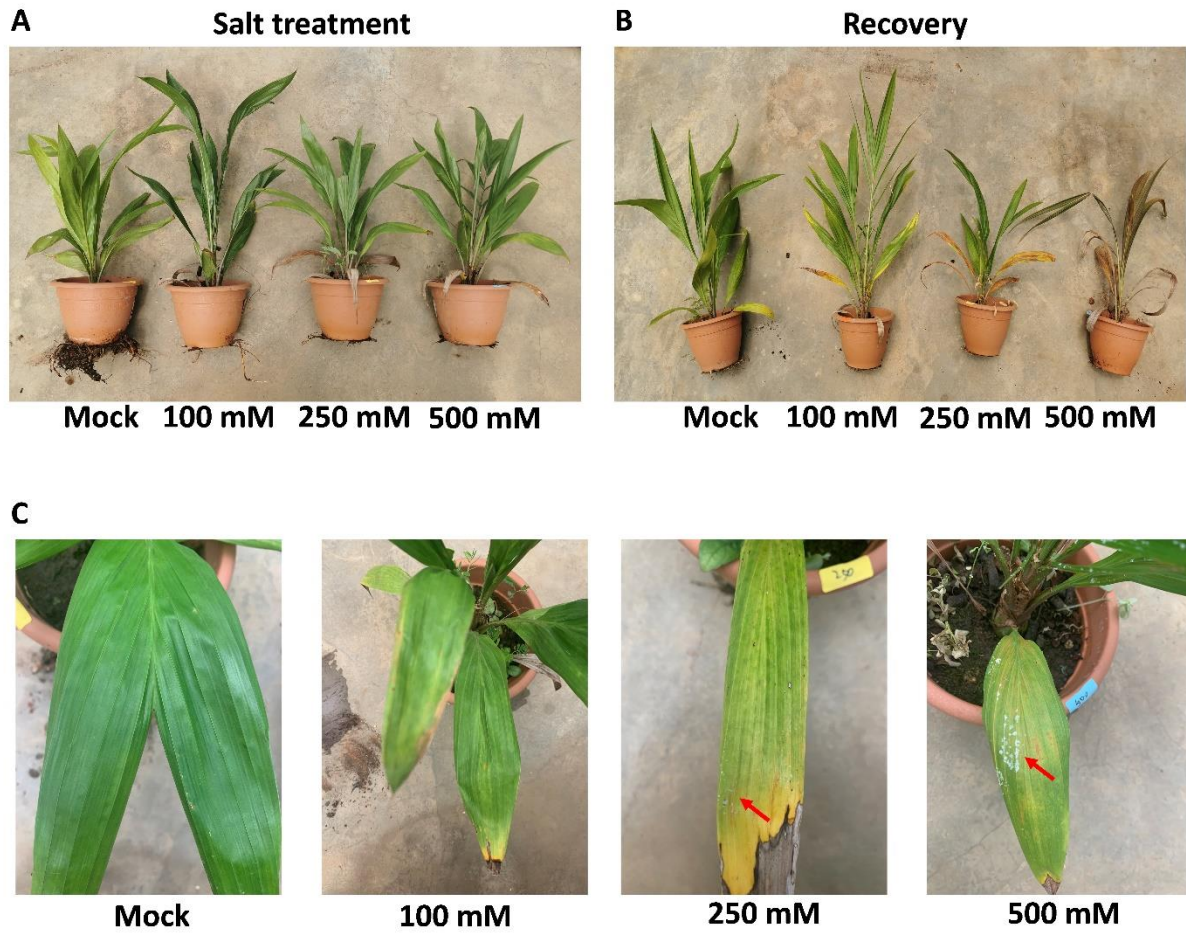

513

514 **Figure 1. Phenotypical changes of oil palm seedlings in response to different level of salt stress**

515



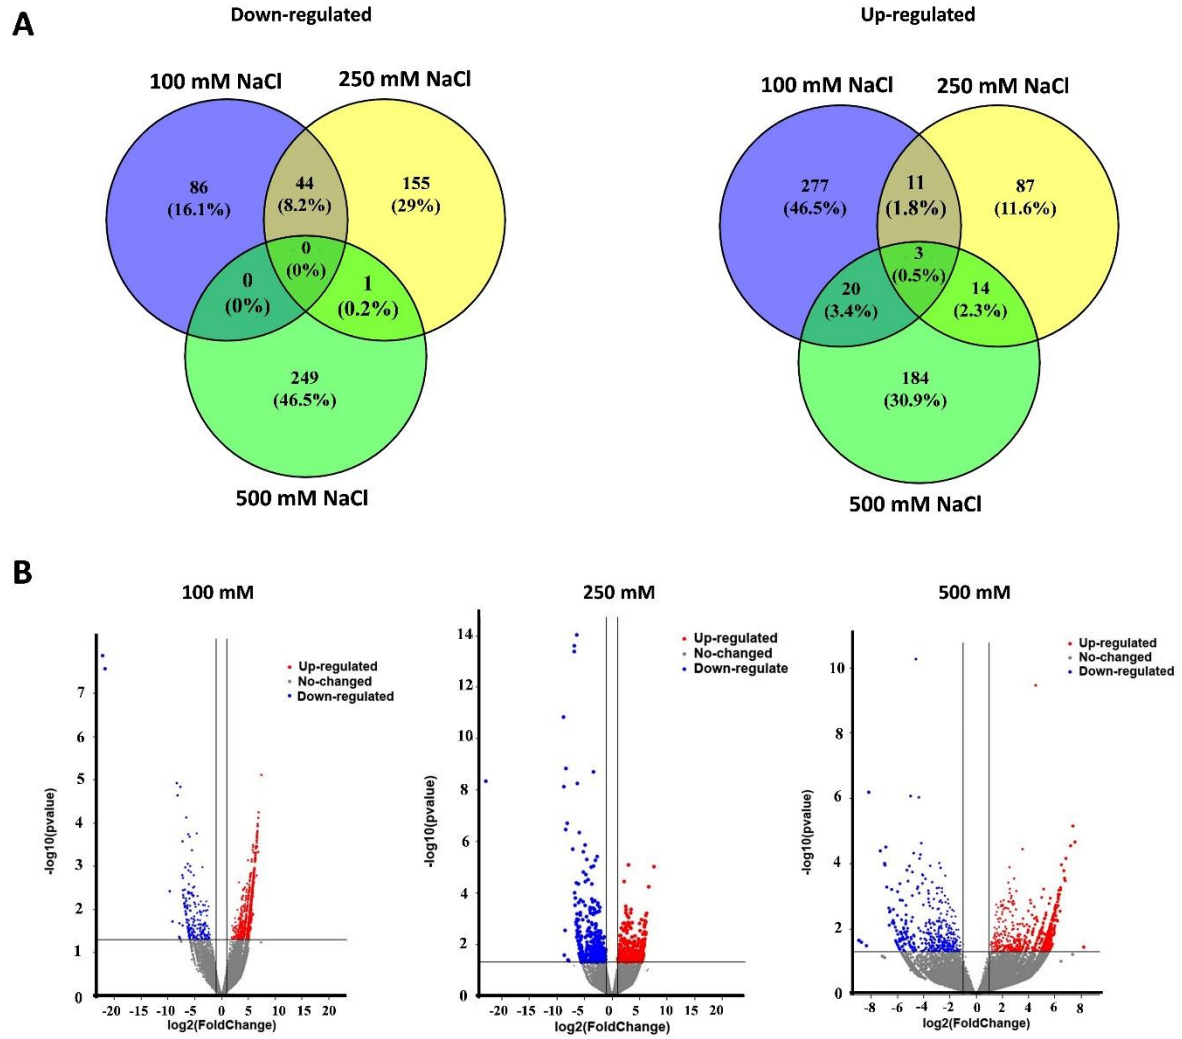

516

517 **Figure 2. Comparison of differentially expressed genes (DEGs) in the young leaves of oil palm**  
518 **seedlings under three level of salt stress: 100 mM NaCl, 250 mM NaCl and 500 mM NaCl**

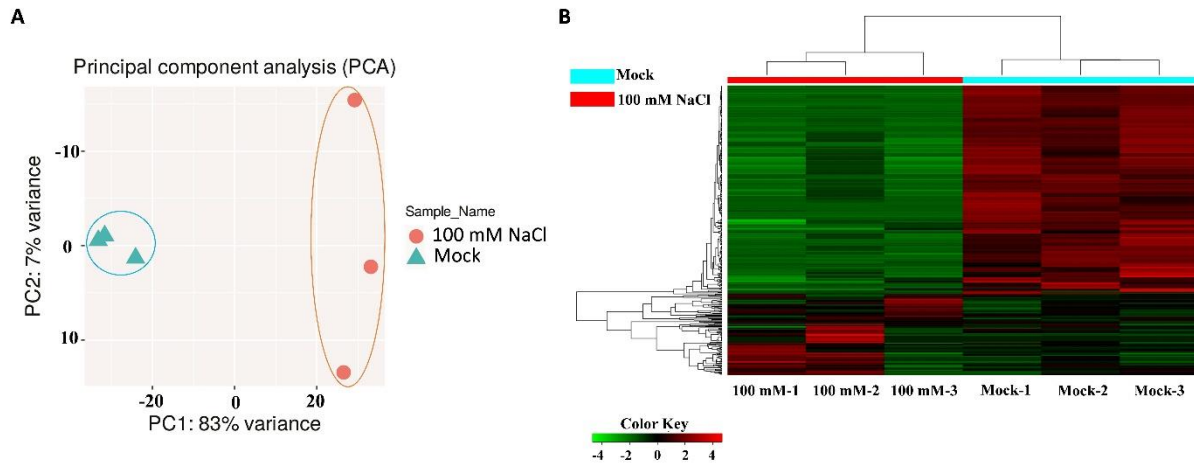

519

520 **Figure 3. The diversities of differentially expressed genes (DEGs) in response to 100 mM NaCl**

521

522

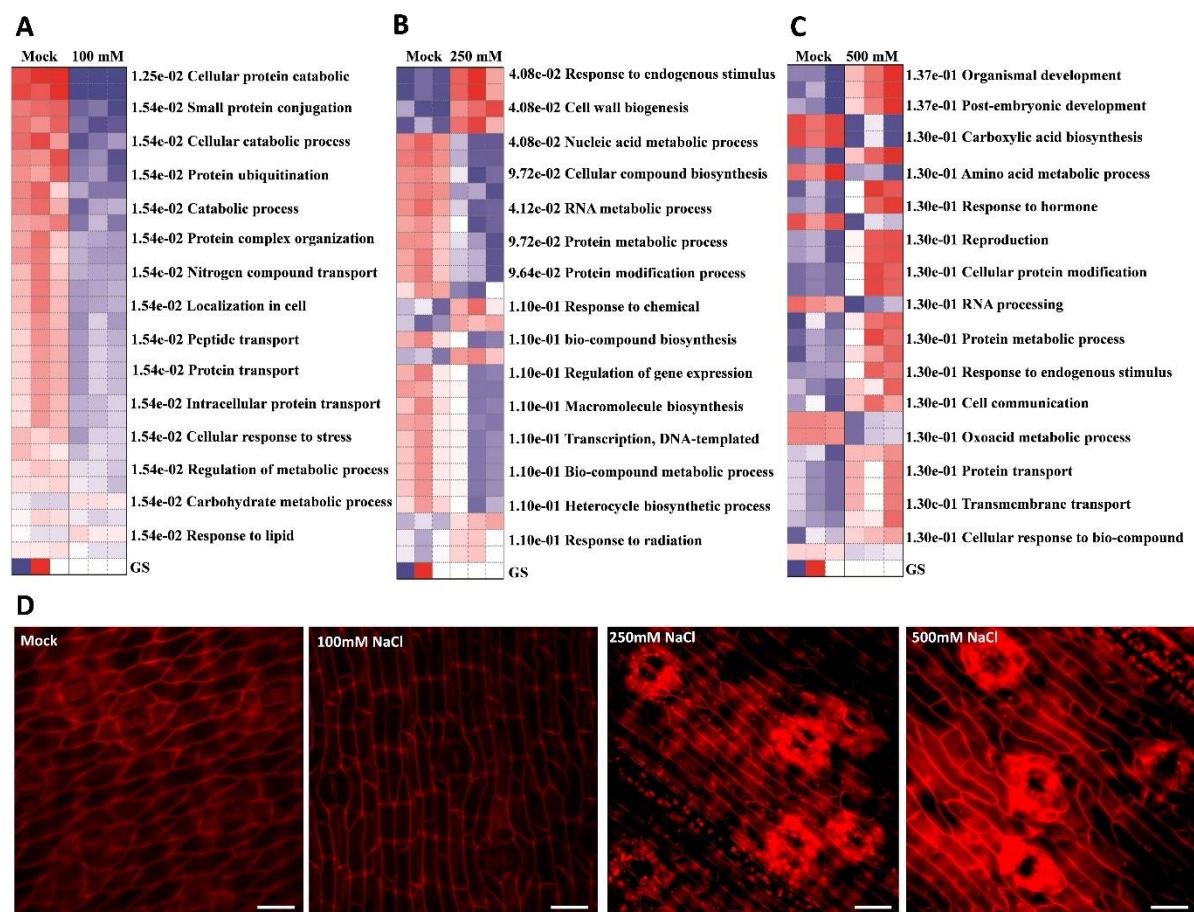

523

524 **Figure 4. Oil palm exhibits diverse biological responses to different level of salt stress**

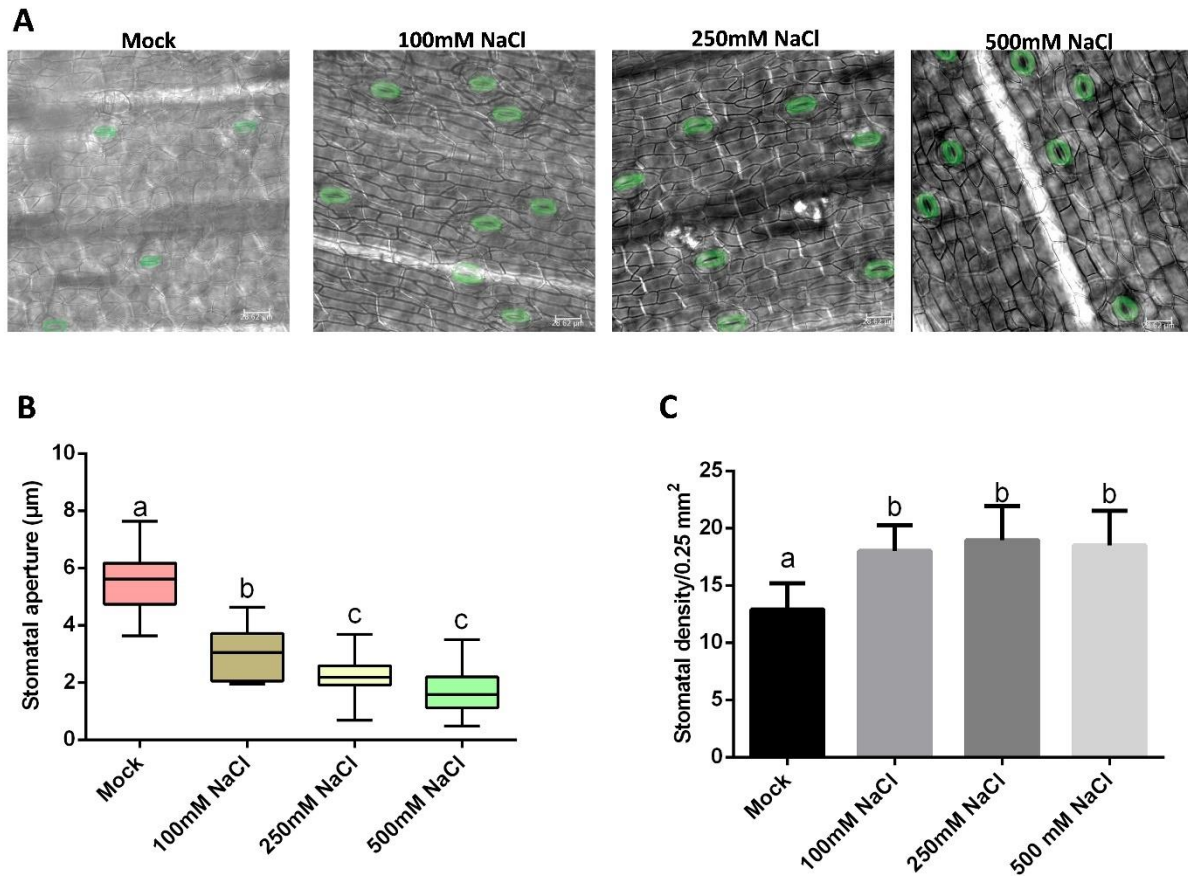

525

526 **Figure 5. Salt stress represses stomatal opening and activates stomatal production in oil**  
527 **palm**

528

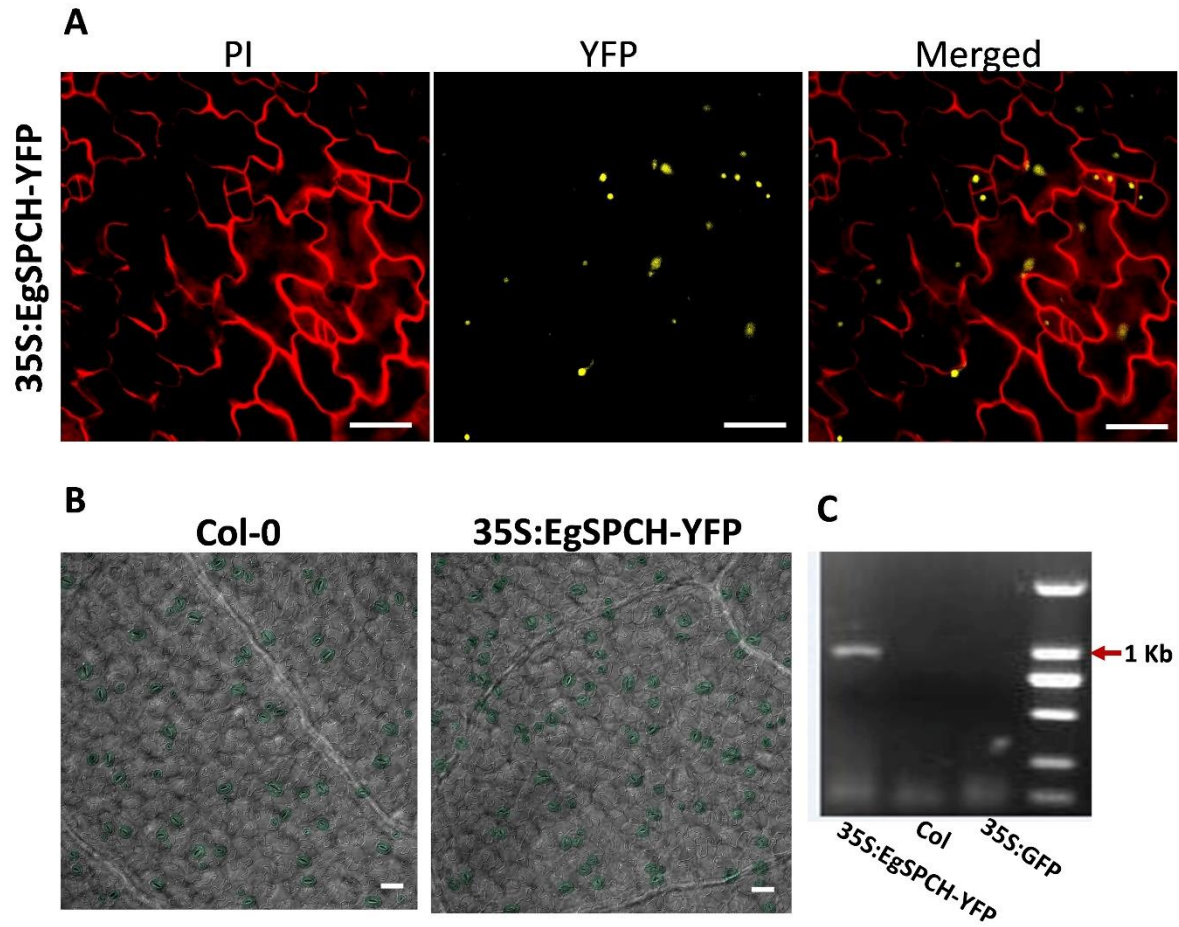

529

530 **Figure 6. Subcellular localization of EgSPCH and the phenotype of transgenic**  
531 ***35S:EgSPCH-YFP* in *Arabidopsis***

532

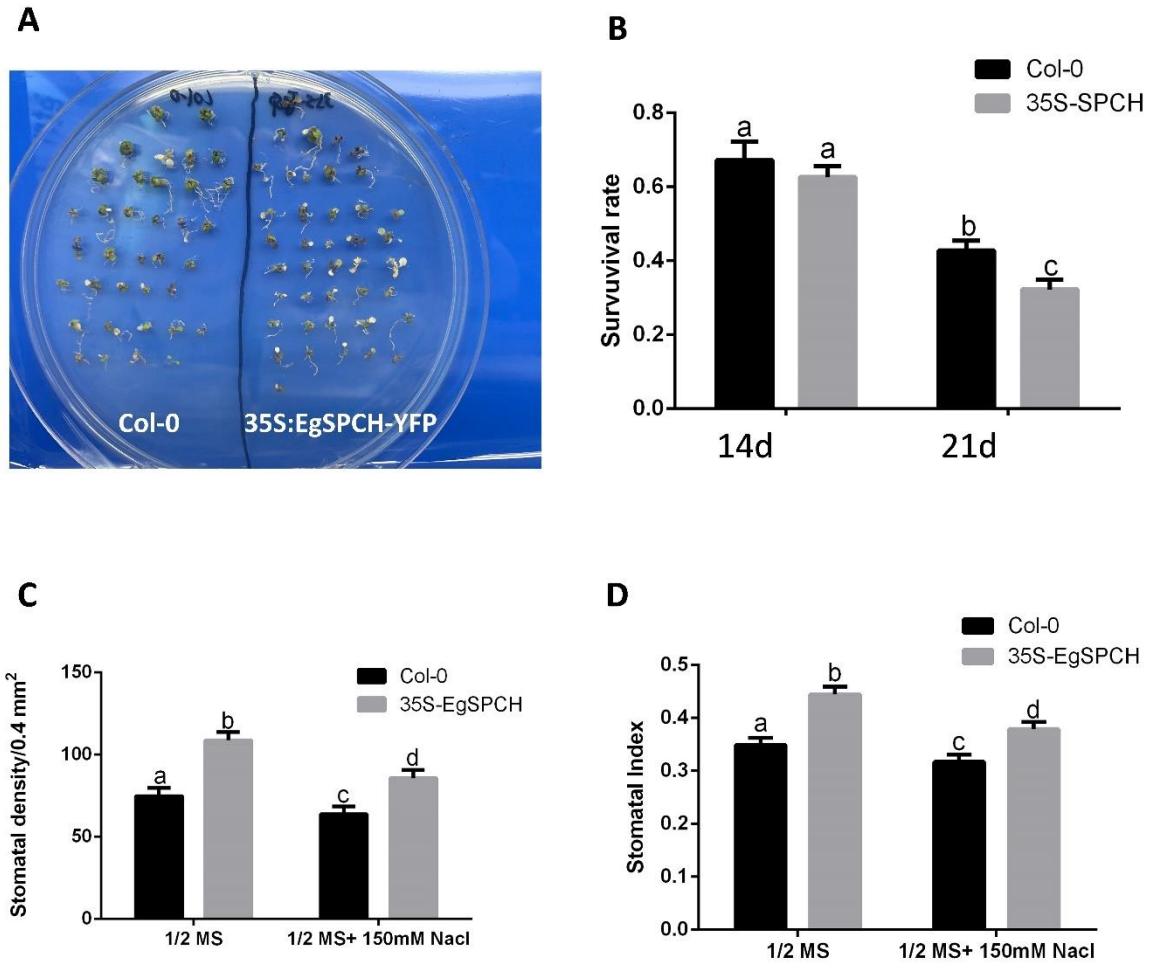

533

534 **Figure 7. Overexpression of EgSPCH increase stomatal production and decrease salt**  
535 **tolerance in *Arabidopsis***

536

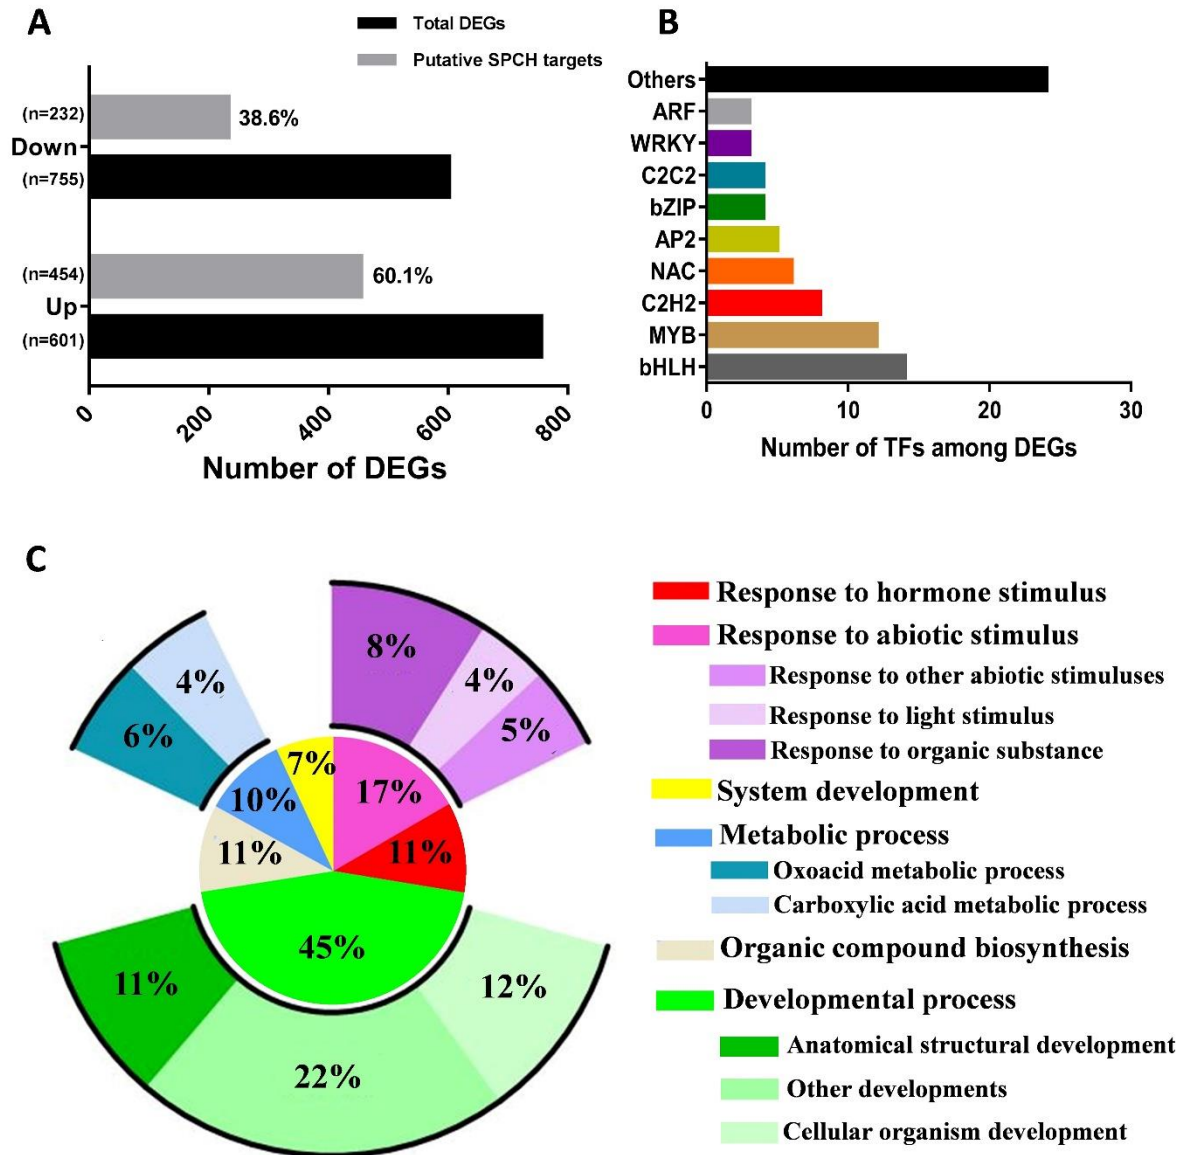

537

538 **Figure 8. The EgSPCH targets among DEGs are involved in multiple salt tolerance biological**  
 539 **processes**

540

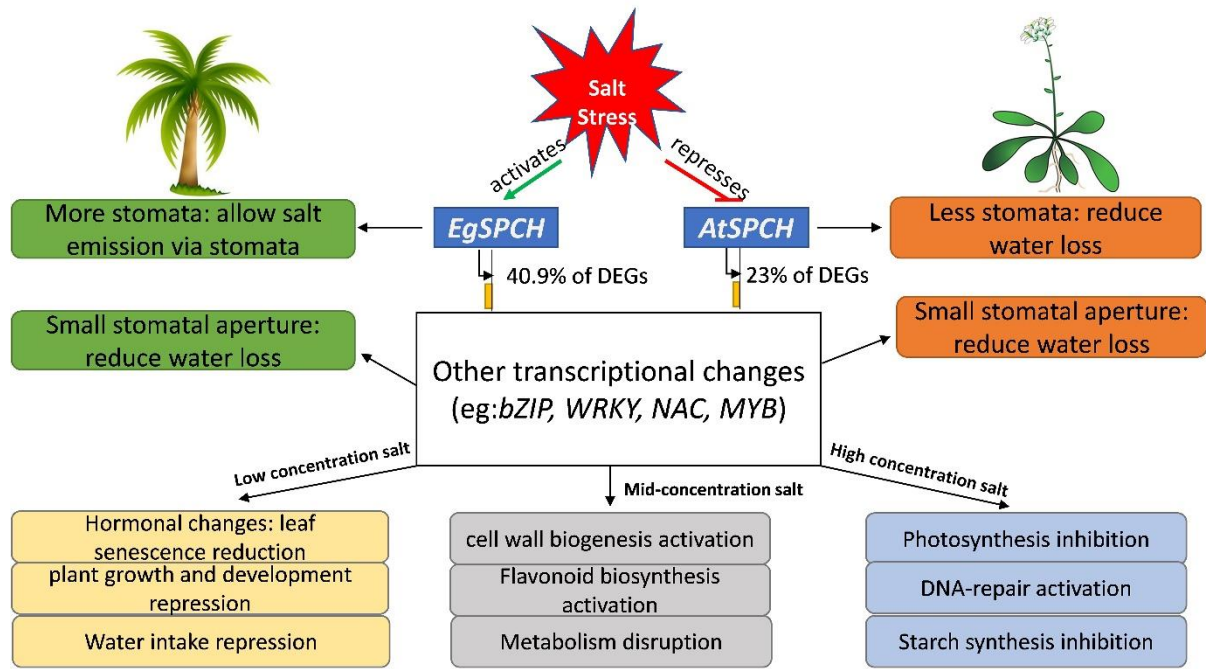

541

542 **Figure 9. A model of the regulatory networks of oil palm leaves in response to different level of**  
543 **salt stress.**

544

545 **Supplemental Table S1. Primers used for plasmid construction and Q-PCR**

| Name              | Sequence (5'-3')           | Usage                |
|-------------------|----------------------------|----------------------|
| EgSPCHcds-F       | CACCATGGGAGACGGCTTATCTGAAC | Plasmid construction |
| EgSPCHcds-R       | TGAGAATGTTTGCAGAATTCCTGTG  | Plasmid construction |
| EgSPCHqrt-F       | GACGGGCAGAACAAGATGTC       | Q-PCR                |
| EgSPCHqrt-R       | GCATGGCATCAATGATCGGA       | Q-PCR                |
| LOC105038400qrt-F | ATGCTCAGAGGCAATCAGGT       | Q-PCR                |
| LOC105038400qrt-R | GAGCTCCAGCCATGAGAGAT       | Q-PCR                |
| LOC105039708qrt-F | CCCAAGCTCCCTGTAATCCA       | Q-PCR                |
| LOC105039708qrt-R | TGAGGGCTGCTTCTCCTATG       | Q-PCR                |
| LOC105047182qrt-F | TTTGGCACTCACAGAACAGC       | Q-PCR                |
| LOC105047182qrt-R | CGTGACCGCACTCCTACTAT       | Q-PCR                |
| LOC105048273qrt-F | TTTGCTTGCAGTTGGAGCAT       | Q-PCR                |
| LOC105048273qrt-R | CACATCAGGACGTATCGCA        | Q-PCR                |
| LOC105054663qrt-F | GAAGCAGTGCAAGACTGGAG       | Q-PCR                |
| LOC105054663qrt-R | GCCTCCTTCTCAAGTCCCAT       | Q-PCR                |
| LOC105055971qrt-F | AGCAGGAACTGGACTCTGTC       | Q-PCR                |
| LOC105055971qrt-R | AGGGAGAGTGGTGTGATGG        | Q-PCR                |
| LOC105057675qrt-F | CTTGCTCTCTCAGCTTGC         | Q-PCR                |
| LOC105057675qrt-R | CCTGCACAACAACTTTGGC        | Q-PCR                |
| LOC105058130qrt-F | ACTGTGGTCGCAAATGAGTG       | Q-PCR                |
| LOC105058130qrt-R | TTACCTTATCCCGCAACCGT       | Q-PCR                |
| LOC105059761qrt-F | TGGTGGGATCTTGCCTGATT       | Q-PCR                |
| LOC105059761qrt-R | TCCAGAAATGACAGCCACCT       | Q-PCR                |

546

547



548 **Supplemental Table S2.** Selected DEGs and their KEGG pathways in response to 250 mM NaCl  
 549 challenge in the young rosette leaves of oil palm seedlings

| Gene                                             | Annotation                                                                        | Subsignaling pathways                            | Expression |
|--------------------------------------------------|-----------------------------------------------------------------------------------|--------------------------------------------------|------------|
| biosynthetic process (48.4%)                     |                                                                                   |                                                  |            |
| LOC105055971                                     | acts upstream of or within flavonoid biosynthetic process                         | Flavonoid biosynthesis                           | Up         |
| LOC105054663                                     | acts upstream of or within flavonoid biosynthetic process                         | Flavonoid biosynthesis                           | Up         |
| LOC105048192                                     | enables flavonol 3-O-glucosyltransferase activity                                 | Flavonoid biosynthesis                           | Down       |
| LOC105043180                                     | acts upstream of or within positive regulation of fatty acid biosynthetic process | Fatty acid biosynthesis                          | Down       |
| LOC105040934                                     | acts upstream of or within maltose biosynthetic process                           | biosynthetic process                             | Down       |
| LOC105043214                                     | acts upstream of or within histidine biosynthetic process                         | biosynthetic process                             | Up         |
| LOC105052269                                     | acts upstream of or within lignin biosynthetic process                            | biosynthetic process                             | Up         |
| LOC105050962                                     | acts upstream of or within chalcone biosynthetic process                          | biosynthetic process                             | Up         |
| metabolic process and stimulus response (44.4%)  |                                                                                   |                                                  |            |
| LOC105039708                                     | acts upstream of or within cellular response to hypoxia                           | response to stress                               | Down       |
| LOC105033561                                     | acts upstream of or within cellular response to hypoxia                           | response to stress                               | Down       |
| LOC105038658                                     | involved in argininosuccinate metabolic process                                   | cellular metabolic process                       | Down       |
| LOC105036034                                     | involved in inositol phosphate dephosphorylation                                  | carbohydrate metabolic process                   | Down       |
| LOC105059863                                     | acts upstream of or within response to insect                                     | response to biotic stimulus                      | Up         |
| LOC105048016                                     | regulation of transcription, DNA-templated                                        | nucleobase-containing compound metabolic process | Up         |
| LOC105057967                                     | involved in secondary metabolic process                                           | secondary metabolic process                      | Up         |
| LOC105059863                                     | acts upstream of or within response to insect                                     | response to biotic stimulus                      | Up         |
| Cell wall biogenesis and cellular process (4.6%) |                                                                                   |                                                  |            |
| LOC105052708                                     | involved in positive regulation of cell size                                      | cellular organization component                  | Down       |
| LOC105044236                                     | located in cell wall                                                              | cell wall                                        | Up         |
| LOC105050457                                     | acts upstream of or within cell wall biogenesis                                   | other cellular processes                         | Up         |
| LOC105040725                                     | involved in regulation of stomatal complex development                            | anatomical structure development                 | Up         |
| LOC105045310                                     | acts upstream of or within stomatal closure                                       | other cellular processes                         | Down       |
| LOC105045721                                     | part of Cul4-RING E3 ubiquitin ligase complex                                     | other cellular components                        | Down       |
| LOC105049519                                     | acts upstream of or within cortical microtubule organization                      | other cellular processes                         | Down       |
| LOC105054281                                     | acts upstream of or within vacuole organization                                   | cellular organization component                  | Up         |

550

551 **Supplemental Table S3.** Selected DEGs and their KEGG pathways in response to 500 mM NaCl  
 552 challenge in the young rosette leaves of oil palm seedlings

| Gene                                      | Annotation                                                              | Subsignaling pathways                            | Expression |
|-------------------------------------------|-------------------------------------------------------------------------|--------------------------------------------------|------------|
| metabolic pathways (55.5%)                |                                                                         |                                                  |            |
| LOC105034472                              | involved in nuclear mRNA surveillance                                   | nucleobase-containing compound metabolic process | Down       |
| LOC105038400                              | involved in pre-mRNA cleavage required for polyadenylation              | other metabolic processes                        | Down       |
| LOC105036107                              | enables protein serine kinase activity                                  | catalytic activity                               | Down       |
| LOC105048792                              | enables protein threonine kinase activity                               | catalytic activity                               | Up         |
| LOC105058704                              | involved in positive regulation of DNA endoreduplication                | other metabolic processes                        | Up         |
| LOC105036127                              | involved in salicylic acid metabolic process                            | other cellular processes                         | Up         |
| LOC105047590                              | involved in piecemeal microautophagy of the nucleus                     | other metabolic processes                        | Down       |
| LOC105040999                              | involved in xylan metabolic process                                     | carbohydrate metabolic process                   | Up         |
| Amino acids and sugar metabolisms (44.5%) |                                                                         |                                                  |            |
| LOC105047182                              | involved in starch biosynthetic process                                 | biosynthetic process                             | Down       |
| LOC105039960                              | acts upstream of or within galactose metabolic process                  | carbohydrate metabolic process                   | Up         |
| LOC105058934                              | involved in glycogen biosynthetic process                               | biosynthetic process                             | Down       |
| LOC105060751                              | enables nucleotide-sugar transmembrane transporter activity             | transporter activity                             | Up         |
| LOC105051911                              | acts upstream of or within dipeptide transport                          | transport                                        | Up         |
| LOC105052606                              | enables galactinol-sucrose galactosyltransferase activity               | transferase activity                             | Down       |
| LOC105059288                              | involved in starch biosynthetic process                                 | biosynthetic process                             | Down       |
| LOC105052606                              | Enables galactinol-sucrose galactosyltransferase activity               | transferase activity                             | Down       |
| nucleotide repair and development (10.0%) |                                                                         |                                                  |            |
| LOC105040725                              | involved in regulation of stomatal complex development                  | anatomical structure development                 | Up         |
| LOC105055780                              | abscisic acid-activated signaling pathway involved in stomatal movement | cellular development                             | Up         |
| LOC105057784                              | involved in single strand break repair                                  | response to stress                               | Up         |
| LOC105038515                              | involved in regulation of root development                              | multicellular organism development               | Up         |
| LOC105047613                              | involved in regulation of transcription, DNA-templated                  | transcription activity                           | Down       |
| LOC105060952                              | enables transcription coregulator activity                              | transcription activity                           | Up         |
| LOC105057675                              | enables single-stranded DNA binding                                     | DNA binding                                      | Up         |
| LOC105044402                              | involved in DNA unwinding involved in DNA replication                   | cellular component organization                  | Up         |

**Control**

**Control +AgNO<sub>3</sub>**

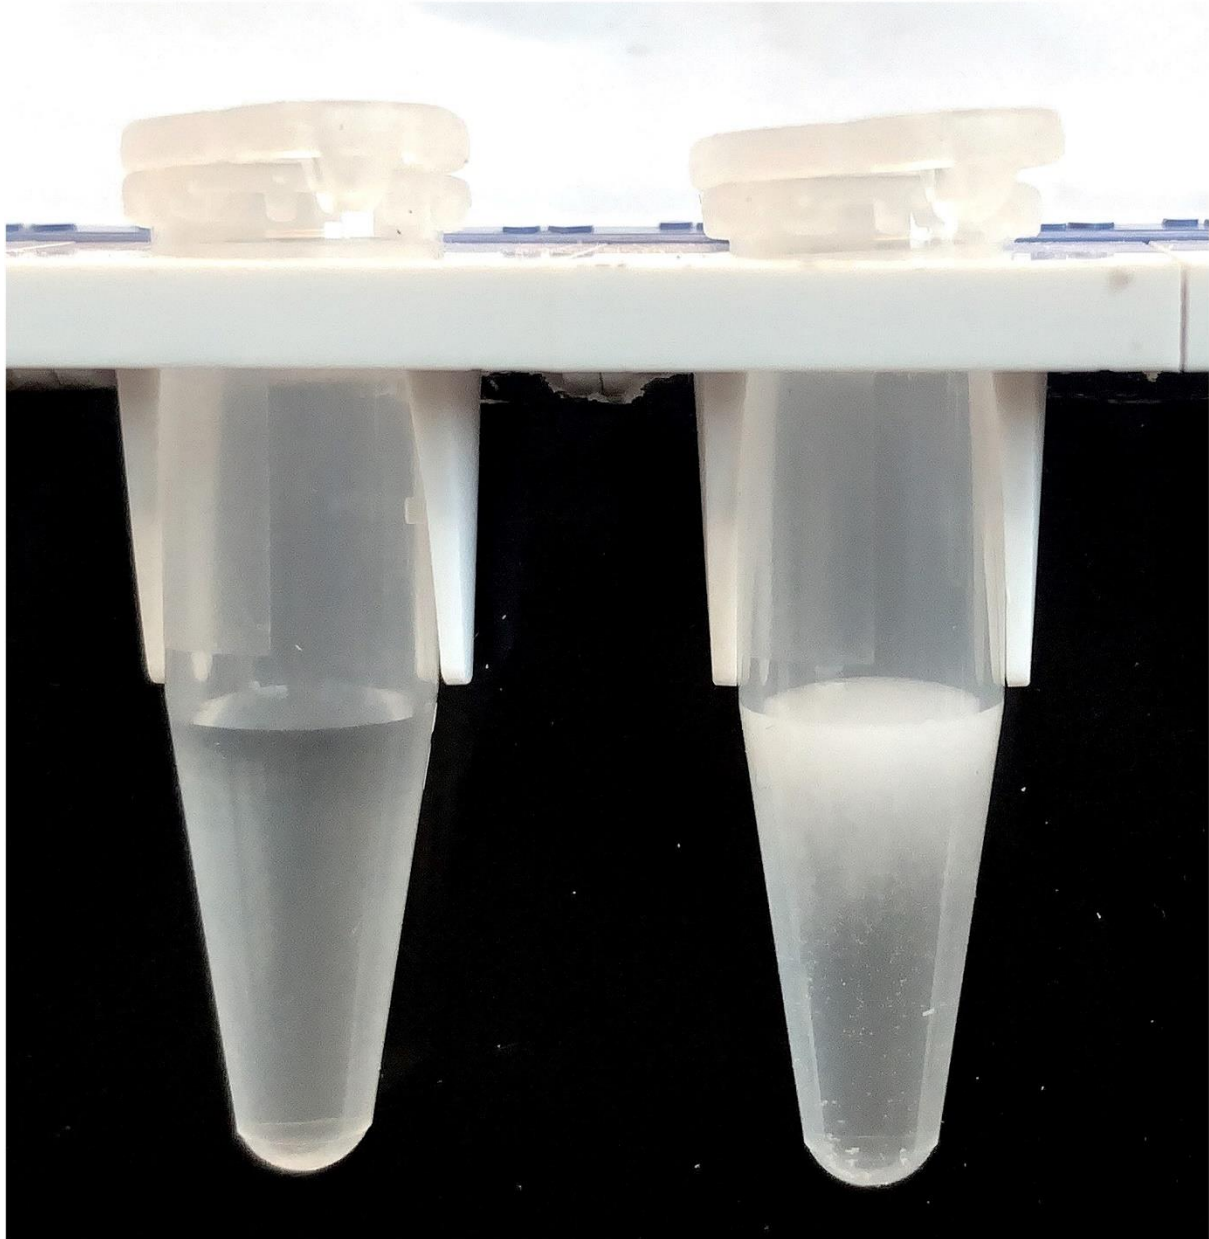

554

555 **Figure S1. Verification of NaCl crystals on oil palm leaf surface**

556

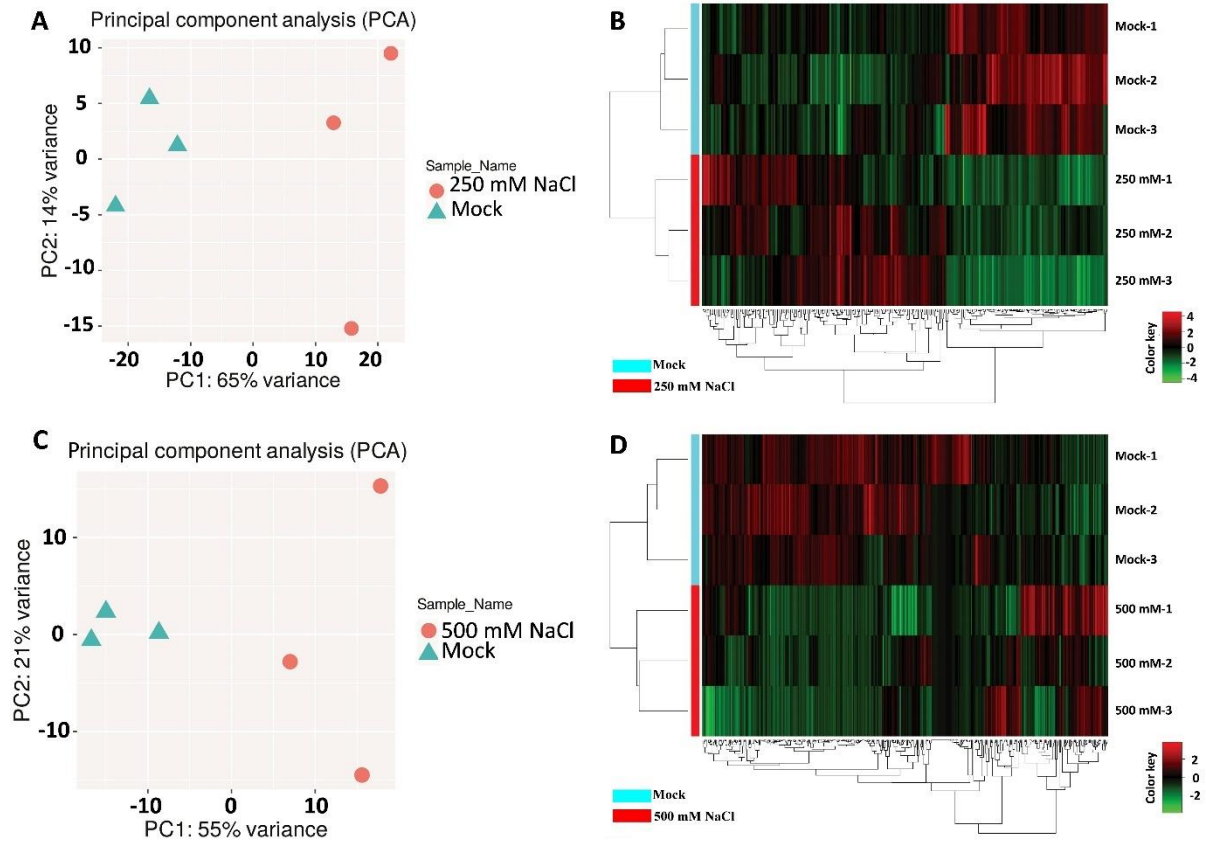

557

558 **Figure S2. The diversities of differentially expressed genes (DEGs) in response to 250 mM and**  
 559 **500 mM NaCl**

560

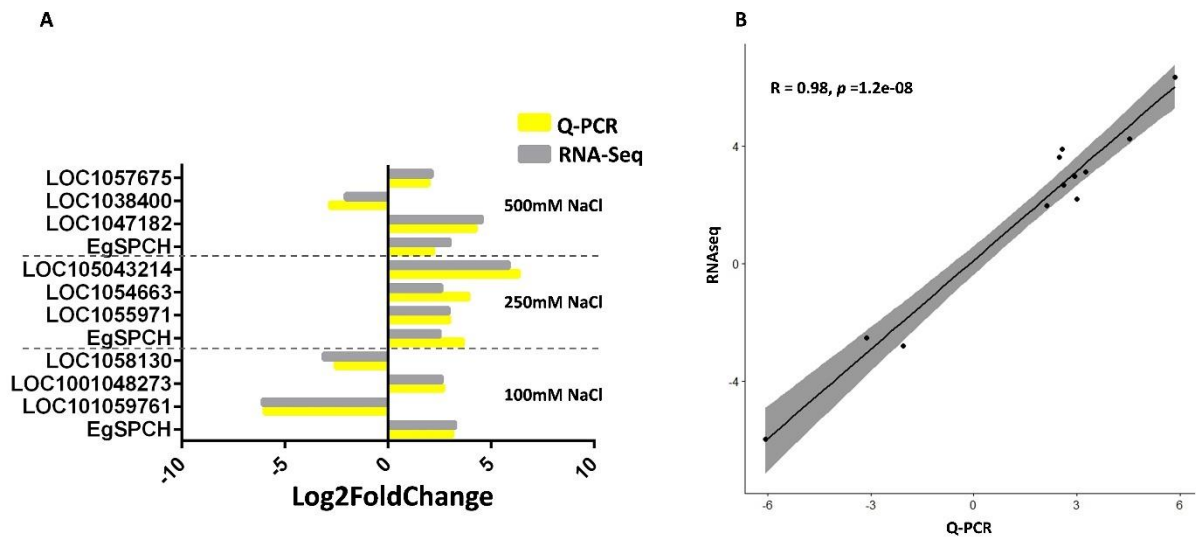

561

562 **Figure S3. Validation of RNA-Seq by Q-PCR**

563

564

565 **REFERENCES**

- 566 **Abbruzzese G, Beritognolo I, Muleo R, Piazzai M, Sabatti M, Scarascia Mugnozza G, Kuzminsky E**  
567 (2009) Leaf morphological plasticity and stomatal conductance in three *Populus alba* L.  
568 genotypes subjected to salt stress. *Environmental and Experimental Botany* **66**: 381-388
- 569 **Anders S, Pyl PT, Huber W** (2015) HTSeq--a Python framework to work with high-throughput  
570 sequencing data. *Bioinformatics* **31**: 166-169
- 571 **Bisgrove SR, Simonich MT, Smith NM, Sattler A, Innes RW** (1994) A disease resistance gene in  
572 *Arabidopsis* with specificity for two different pathogen avirulence genes. *The Plant Cell* **6**: 927-  
573 933
- 574 **Cha-Um S, Takabe T, Kirdmanee C** (2010) Ion contents, relative electrolyte leakage, proline  
575 accumulation, photosynthetic abilities and growth characters of oil palm seedlings in response  
576 to salt stress. *Pakistan Journal of Botany* **42**: 2191-2020
- 577 **Chen H-J, Chen J-Y, Wang S-J** (2007) Molecular regulation of starch accumulation in rice seedling  
578 leaves in response to salt stress. *Acta Physiologiae Plantarum* **30**: 135-142
- 579 **Chen PY, Ma M, Yu Shi L** (2019) Trade-off between salt secretion and gas exchange by stomata in the  
580 leaves of *Glycyrrhiza uralensis*. *Current Science* **116**
- 581 **Corley RHV, Tinker PB** (2008) *The oil palm*. John Wiley & Sons
- 582 **Deinlein U, Stephan AB, Horie T, Luo W, Xu G, Schroeder JI** (2014) Plant salt-tolerance mechanisms.  
583 *Trends Plant Sci* **19**: 371-379
- 584 **Dobin A, Davis CA, Schlesinger F, Drenkow J, Zaleski C, Jha S, Batut P, Chaisson M, Gingeras TR** (2013)  
585 STAR: ultrafast universal RNA-seq aligner. *Bioinformatics* **29**: 15-21
- 586 **El Rabey HA, Al-Malki AL, Abulnaja KO** (2016) Proteome analysis of date palm (*Phoenix dactylifera* L.)  
587 under severe drought and salt stress. *International Journal of Genomics* **2016**
- 588 **Feng W, Kita D, Peaucelle A, Cartwright HN, Doan V, Duan Q, Liu MC, Maman J, Steinhorst L, Schmitz-  
589 Thom I, Yvon R, Kudla J, Wu HM, Cheung AY, Dinneny JR** (2018) The FERONIA Receptor Kinase  
590 Maintains Cell-Wall Integrity during Salt Stress through Ca(2+) Signaling. *Curr Biol* **28**: 666-675  
591 e665
- 592 **Fitzherbert EB, Struebig MJ, Morel A, Danielsen F, Bruhl CA, Donald PF, Phalan B** (2008) How will oil  
593 palm expansion affect biodiversity? *Trends Ecol Evol* **23**: 538-545
- 594 **Ge SX, Son EW, Yao R** (2018) iDEP: an integrated web application for differential expression and  
595 pathway analysis of RNA-Seq data. *BMC Bioinformatics* **19**: 534
- 596 **Golldack D, Luking I, Yang O** (2011) Plant tolerance to drought and salinity: stress regulating  
597 transcription factors and their functional significance in the cellular transcriptional network.  
598 *Plant Cell Rep* **30**: 1383-1391
- 599 **Hedrich R, Shabala S** (2018) Stomata in a saline world. *Curr Opin Plant Biol* **46**: 87-95
- 600 **Henry W, Wan HH** (2012) Effects of salinity on fresh fruit bunch (FFB) production and oil-to-bunch  
601 ratio of oil palm (*Elaeis guineensis*) planted in reclaimed mangrove swamp areas in Sabah. *Oil  
602 Palm Bulletin* **65**: 12-20
- 603 **Hetherington AM, Woodward FI** (2003) The role of stomata in sensing and driving environmental  
604 change. *Nature* **424**: 901-908
- 605 **Huang XY, Chao DY, Gao JP, Zhu MZ, Shi M, Lin HX** (2009) A previously unknown zinc finger protein,  
606 DST, regulates drought and salt tolerance in rice via stomatal aperture control. *Genes Dev* **23**:  
607 1805-1817
- 608 **Jin J, Lee M, Bai B, Sun Y, Qu J, Alfiko Y, Lim CH, Suwanto A, Sugiharti M, Wong L** (2016) Draft genome  
609 sequence of an elite Dura palm and whole-genome patterns of DNA variation in oil palm. *DNA  
610 Research* **23**: 527-533
- 611 **Jossier M, Kroniewicz L, Dalmas F, Le Thiec D, Ephritikhine G, Thomine S, Barbier-Brygoo H,  
612 Vavasseur A, Filleur S, Leonhardt N** (2010) The *Arabidopsis* vacuolar anion transporter,  
613 AtCLCc, is involved in the regulation of stomatal movements and contributes to salt tolerance.  
614 *Plant J* **64**: 563-576

- 615 **Ku Y-S, Sintaha M, Cheung M-Y, Lam H-M** (2018) Plant hormone signaling crosstalks between biotic  
616 and abiotic stress responses. *International Journal of Molecular Sciences* **19**: 3206
- 617 **Kumar K, Kumar M, Kim S-R, Ryu H, Cho Y-G** (2013) Insights into genomics of salt stress response in  
618 rice. *Rice* **6**: 1-15
- 619 **Kumari A, Jewaria PK, Bergmann DC, Kakimoto T** (2014) Arabidopsis reduces growth under osmotic  
620 stress by decreasing SPEECHLESS protein. *Plant Cell Physiol* **55**: 2037-2046
- 621 **Lampard GR, MacAlister CA, Bergmann DC** (2008) Arabidopsis stomatal initiation is controlled by  
622 MAPK-mediated regulation of the bHLH SPEECHLESS. *Science* **322**: 1113-1116
- 623 **Lau OS, Davies KA, Chang J, Adrian J, Rowe MH, Ballenger CE, Bergmann DC** (2014) Direct roles of  
624 SPEECHLESS in the specification of stomatal self-renewing cells. *Science* **345**: 1605-1609
- 625 **Lau OS, Song Z, Zhou Z, Davies KA, Chang J, Yang X, Wang S, Lucyshyn D, Tay IHZ, Wigge PA,  
626 Bergmann DC** (2018) Direct Control of SPEECHLESS by PIF4 in the High-Temperature Response  
627 of Stomatal Development. *Curr Biol* **28**: 1273-1280 e1273
- 628 **Lijuan C, Huiming G, Yi L, Hongmei C** (2015) Chalcone synthase EaCHS1 from Eupatorium  
629 adenophorum functions in salt stress tolerance in tobacco. *Plant cell reports* **34**: 885-894
- 630 **Liu X, Liu S, Zhang J, Wu Y, Wu W, Zhang Y, Liu B, Tang R, He L, Li R** (2020) Optimization of reference  
631 genes for qRT-PCR analysis of microRNA expression under abiotic stress conditions in  
632 sweetpotato. *Plant Physiology and Biochemistry* **154**: 379-386
- 633 **Love MI, Huber W, Anders S** (2014) Moderated estimation of fold change and dispersion for RNA-seq  
634 data with DESeq2. *Genome Biol* **15**: 550
- 635 **Ma S, Gong Q, Bohnert HJ** (2006) Dissecting salt stress pathways. *Journal of experimental botany* **57**:  
636 1097-1107
- 637 **Munns R** (2005) Genes and salt tolerance: bringing them together. *New Phytol* **167**: 645-663
- 638 **Nakagawa T, Suzuki T, Murata S, Nakamura S, Hino T, Maeo K, Tabata R, Kawai T, Tanaka K, Niwa Y**  
639 (2007) Improved Gateway binary vectors: high-performance vectors for creation of fusion  
640 constructs in transgenic analysis of plants. *Bioscience, biotechnology, and biochemistry* **71**:  
641 2095-2100
- 642 **Orsini F, Alnayef M, Bona S, Maggio A, Gianquinto G** (2012) Low stomatal density and reduced  
643 transpiration facilitate strawberry adaptation to salinity. *Environmental and Experimental*  
644 *Botany* **81**: 1-10
- 645 **Robinson MF, Very A-A, Sanders D, Mansfield T** (1997) How can stomata contribute to salt tolerance?  
646 *Annals of botany* **80**: 387-393
- 647 **Samakovli D, Ticha T, Vavrdova T, Ovecka M, Luptovciak I, Zapletalova V, Kucharova A, Krenek P,  
648 Krasnylenko Y, Margaritopoulou T, Roka L, Milioni D, Komis G, Hatzopoulos P, Samaj J** (2020)  
649 YODA-HSP90 Module Regulates Phosphorylation-Dependent Inactivation of SPEECHLESS to  
650 Control Stomatal Development under Acute Heat Stress in Arabidopsis. *Mol Plant* **13**: 612-633
- 651 **Sanusi N, Rosli R, Halim MAA, Chan KL, Nagappan J, Azizi N, Amiruddin N, Tatarinova TV, Low EL**  
652 (2018) PalmXplore: oil palm gene database. *Database (Oxford)* **2018**
- 653 **Shen W, Le S, Li Y, Hu F** (2016) SeqKit: A Cross-Platform and Ultrafast Toolkit for FASTA/Q File  
654 Manipulation. *PLoS One* **11**: e0163962
- 655 **Shen X, Wang Z, Song X, Xu J, Jiang C, Zhao Y, Ma C, Zhang H** (2014) Transcriptomic profiling revealed  
656 an important role of cell wall remodeling and ethylene signaling pathway during salt  
657 acclimation in Arabidopsis. *Plant molecular biology* **86**: 303-317
- 658 **Singh R, Ong-Abdullah M, Low ET, Manaf MA, Rosli R, Nookiah R, Ooi LC, Ooi SE, Chan KL, Halim MA,  
659 Azizi N, Nagappan J, Bacher B, Lakey N, Smith SW, He D, Hogan M, Budiman MA, Lee EK,  
660 DeSalle R, Kudrna D, Goicoechea JL, Wing RA, Wilson RK, Fulton RS, Ordway JM, Martienssen  
661 RA, Sambanthamurthi R** (2013) Oil palm genome sequence reveals divergence of interfertile  
662 species in Old and New worlds. *Nature* **500**: 335-339
- 663 **Stepien P, Johnson GN** (2009) Contrasting responses of photosynthesis to salt stress in the glycophyte  
664 Arabidopsis and the halophyte *Thellungiella*: role of the plastid terminal oxidase as an  
665 alternative electron sink. *Plant physiology* **149**: 1154-1165

- 666 **Vahisalu T, Kollist H, Wang YF, Nishimura N, Chan WY, Valerio G, Lamminmaki A, Brosche M, Moldau**  
667 **H, Desikan R, Schroeder JI, Kangasjarvi J** (2008) SLAC1 is required for plant guard cell S-type  
668 anion channel function in stomatal signalling. *Nature* **452**: 487-491
- 669 **Van Zelm E, Zhang Y, Testerink C** (2020) Salt tolerance mechanisms of plants. *Annual Review of Plant*  
670 *Biology* **71**: 403-433
- 671 **Wang L, Lee M, Ye B, Yue GH** (2020) Genes, pathways and networks responding to drought stress in  
672 oil palm roots. *Scientific reports* **10**: 1-13
- 673 **Watkins JM, Chapman JM, Muday GK** (2017) Abscisic Acid-Induced Reactive Oxygen Species Are  
674 Modulated by Flavonols to Control Stomata Aperture. *Plant Physiol* **175**: 1807-1825
- 675 **Wu Z, Chen L, Yu Q, Zhou W, Gou X, Li J, Hou S** (2019) Multiple transcriptional factors control stomata  
676 development in rice. *New Phytologist* **223**: 220-232
- 677 **Yang Y, Guo Y** (2018) Unraveling salt stress signaling in plants. *J Integr Plant Biol* **60**: 796-804
- 678 **Zagorchev L, Kamenova P, Odjakova M** (2014) The role of plant cell wall proteins in response to salt  
679 stress. *Scientific World journal* **2014**: 764089
- 680 **Zhang H, Zhu J, Gong Z, Zhu JK** (2021) Abiotic stress responses in plants. *Nature Reviews Genetics*
- 681 **Zhang X, Henriques R, Lin SS, Niu QW, Chua NH** (2006) Agrobacterium-mediated transformation of  
682 *Arabidopsis thaliana* using the floral dip method. *Nat Protoc* **1**: 641-646
- 683 **Zhao C, Zayed O, Yu Z, Jiang W, Zhu P, Hsu CC, Zhang L, Tao WA, Lozano-Duran R, Zhu JK** (2018)  
684 Leucine-rich repeat extensin proteins regulate plant salt tolerance in *Arabidopsis*. *Proc Natl*  
685 *Acad Sci U S A* **115**: 13123-13128
- 686 **Zuo Z, Roux ME, Sæmundsson HP, Müller M, Munne Bosch S, Petersen M** (2021) The *Arabidopsis*  
687 *thaliana* mRNA decay factor PAT1 functions in osmotic stress responses and decaps ABA-  
688 responsive genes. *FEBS letters* **595**: 253-263
- 689 **Zvanarou S, Vágnerová R, Mackievic V, Usnich S, Smolich I, Sokolik A, Yu M, Huang X, Angelis K,**  
690 **Demidchik V** (2020) Salt stress triggers generation of oxygen free radicals and DNA breaks in  
691 *Physcomitrella patens* protonema. *Environmental and Experimental Botany* **180**: 104236
- 692
